# Supplementary material for: Halogen bonding with carbon: directional assembly of non-derivatised aromatic carbon systems into robust supramolecular ladder architectures
Source: Chem Sci. 2023 Oct 24;14(45):13031–41. doi: 10.1039/d3sc04191c (PMC10664517; doi:10.1039/d3sc04191c)
Supplement: SC-014-D3SC04191C-s001 [file SC-014-D3SC04191C-s001.xlsx]

## Sheet: Double bonds
NAME	DIST1	ANG1
LARHAQ	3.29	167.745
VIHFIC	3.313	162.368
BOWRUC02	3.324	136.285
UGECEQ	3.37	162.307
DUJKEA	3.407	164.706
DUJJUP	3.409	164.853
ICILIP	3.427	176.792
BOWRUC02	3.433	103.262
ULIDEZ	3.442	159.159
BOWRUC02	3.45	118.976
DORJEB	3.458	158.687
VIGMEF	3.458	167.381
NIVDON	3.474	158.835
TIPKAH	3.53	157.357
UDERUR	3.531	174.279
QUQQAW	3.541	159.049
ZAQFOP	3.547	142.448
OQISUE	3.551	153.401
VEBSOL	3.552	175.109
QINNEJ	3.559	148.94
LIPWAK	3.564	117.501
OQISOY	3.569	156.297
EGAFIE	3.572	154.765
DORJOL	3.577	172.974
XIZCIU	3.578	137.411
ULIDEZ	3.579	146.675
ZOGTOG	3.579	155.048
BOWRUC03	3.58	160.302
XIZCIU	3.586	134.275
XUCKAK	3.588	144.432
QUNPAS	3.591	148.874
VIHFAU	3.601	156.848
PUDREL	3.602	116.073
DUSGEG	3.605	152.945
BOWRUC02	3.614	131.278
ISODUQ	3.616	138.266
ESOIAC	3.618	166.33
XUCKAK	3.619	162.014
XUCKAK	3.622	170.152
BEQWEB	3.63	93.354
COJXIJ	3.631	90.636
BOWRUC07	3.633	113.411
NABVUI	3.639	130.01
BOWRUC	3.643	135.559
QINNEJ	3.643	147.482
BOWRUC07	3.644	137.286
VIHFIC	3.644	153.062
BOWRUC	3.652	121.196
IHORED	3.655	169.7
UWOSIL	3.656	94.022
EGAFIE	3.657	96.632
EJEHEJ	3.66	168.609
COJXIJ	3.662	91.389
ZOGVAU	3.669	162.621
PICNOH	3.675	156.19
DORJOL	3.676	136.636
JUWMOF	3.676	139.33
HESTIA	3.677	171.643
MADVOG	3.68	160.915
BOWRUC07	3.68	138.059
CIZLUV	3.683	155.046
IZICOL	3.683	90.149
UWUJAA	3.691	98.997
UNOMIV01	3.695	144.349
OQISOY	3.697	158.91
OQISUE	3.698	156.654
NIJFET	3.7	148.792
TIPKEL	3.701	146.893
UNOMIV	3.702	145.076
SEVVOH	3.704	162.229
TIETHE04	3.704	140.794
EJEHEJ	3.705	167.504
VETQOB	3.712	163.576
JETYIT	3.718	167.686
PUYXUE	3.718	156.992
BOWRUC02	3.72	96.887
JETYIT	3.72	166.391
VIGMEF	3.721	162.251
BAXVIG	3.722	167.319
NIZHAI	3.725	160.325
GILCEK	3.729	162.667
QOJKOP	3.734	133.5
HUDJUL	3.735	125.167
OJILAW	3.735	162.08
XECPON	3.735	92.475
CIZLUV	3.736	110.918
DORJEB	3.739	139.812
CEZVEL	3.74	92.308
DIJDIL01	3.741	132.214
XECPON	3.741	91.916
IZITAP	3.741	133.328
YEXVIJ	3.743	94.195
AGOXIF	3.745	120.983
UGICIZ	3.75	137.342
DORJIF	3.751	126.194
PEKYUA	3.751	147.345
PUGLEJ	3.752	98.294
XUGYUW	3.752	96.963
VETQOB	3.754	137.936
IURIDN10	3.755	103.728
NABVUI	3.755	134.276
XUCKAK	3.756	157.292
KOYNUH	3.757	113.333
IURIDN11	3.758	102.134
CEZVOV	3.759	93.299
PIRGIG	3.762	174.66
VETQOB	3.762	143.25
NEGLIU	3.763	93.385
SELDAQ	3.763	112.669
BOWRUC07	3.764	115.053
SEVVIB	3.765	165.152
DUMCAS	3.767	140.03
BOWRUC03	3.774	117.631
OQERAE	3.775	90.505
KORXIY	3.777	106.024
QUWFUM	3.777	98.014
GILCEK	3.779	162.859
ULIDEZ	3.779	129.15
XUCKAK	3.781	135.933
KORYAR	3.782	114.853
YULVIM	3.782	140.278
VIGMEF	3.785	126.836
SIVWUP	3.788	92.717
CIZLOP	3.789	103.717
QIHCEP	3.789	91.536
ISODOK	3.8	142.525
BOWRUC	3.801	161.08
VEPJAE	3.801	152.15
YIDGAV	3.802	100.138
COYKUY	3.803	93.637
OPUPAS	3.803	94.112
PUJNIU	3.803	97.32
ICAJIF	3.805	97.033
SEVVUN	3.808	161.734
BOWRUC	3.812	117.562
CIZMAC	3.812	121.635
IGUANM	3.812	107.938
PADBAX	3.812	111.098
BOWREM	3.814	153.181
MOSFOQ	3.815	166.26
SEVVIB	3.815	167.82
YIVGOA	3.815	160.505
HELHEN	3.818	96.5
PEKYUA	3.818	140.3
CEZVEL	3.819	117.688
EGAFIE	3.821	91.158
ZILBIF	3.822	92.72
SEVVIB	3.823	167.742
GEBXIX	3.824	100.076
QUWFUM	3.824	96.641
CIZLUV	3.825	152.714
YAHWUZ	3.826	129.934
DIMYUT10	3.827	110.099
JEDBUS	3.828	91.153
KIGWOP	3.828	122.977
CIZLOP	3.83	165.042
CIZMAC	3.832	121.855
WAVXEX	3.834	136.517
VIZLUO	3.835	151.107
POKFUQ01	3.837	119.684
SANMUR	3.837	114.258
HUKTEM	3.838	138.927
GOTXEV	3.839	157.509
LUKWAS02	3.839	92.385
SEVVIB	3.839	167.065
UTENUE	3.839	104.276
XECPON	3.842	95.66
YILZEA	3.847	120.39
YILZEA	3.847	120.39
CEZVEL	3.85	137.114
IGANUA	3.85	144.142
XECPON	3.852	93.805
FUPFAZ	3.853	95.885
HILTOM	3.853	101.406
BEQWEB	3.854	91.393
KUNGIM01	3.854	93.946
JUWMOF	3.855	156.617
UGICIZ	3.856	132.35
QEMHUO	3.857	135.064
ZIRKIX	3.857	142.599
COJXIJ	3.858	93.287
DORJEB	3.858	164.482
HELGUC	3.858	105.951
COJXIJ	3.861	110.209
JUWMOF	3.863	97.305
VIHFIC	3.863	103.346
PEXPEQ	3.867	132.385
FUPFIH	3.87	151.986
RIQFOO	3.87	118.594
BOWRUC07	3.873	141.884
EYOFEF	3.873	102.416
HIFYAW	3.874	167.999
LEXSEN	3.874	92.106
ENAKIP	3.875	101.45
ZAQFOP	3.875	115.314
UWUJAA	3.876	165.194
HUDSUW	3.877	113.525
ZOGSEV	3.877	110.275
HELGUC	3.878	106.384
MUFDAV	3.878	91.611
SUKYOP	3.88	119.872
MOSFOQ	3.881	93.476
SEVVIB	3.881	164.37
DORJIF	3.884	92.009
CAPSEU	3.885	97.044
EDAGIZ	3.886	111.107
SEVVIB	3.886	163.898
UGICAR	3.888	137.055
UTISOG	3.888	90.392
BOWRUC	3.889	134.662
CIZLOP	3.892	124.473
HUDSUW	3.893	164.819
ZAQFOP	3.894	136.267
BOWRUC03	3.896	168.744
CIZMAC	3.896	122.881
COJXIJ	3.897	109.389
USUBIW	3.897	166.708
OQISUE	3.898	107.191
WEYZIM	3.898	123.027
NINJOM	3.9	90.623
VETQOB	3.901	137.521
DOPWEM	3.903	93.729
UWUHAY	3.903	170.576
CIZLOP	3.904	157.825
VIZLUO	3.904	170.381
NOYCUB	3.905	130.077
SUKYIJ	3.905	134.037
LUKWAS03	3.906	94.787
ABEPAY	3.908	103.471
VIHFIC	3.909	163.477
ZOGSIZ	3.909	111.007
UWUHUS	3.91	163.273
PUZFOI	3.913	99.346
VEBSOL	3.916	149.54
NIVDON	3.917	132.154
VISQUK	3.917	105.367
LUKWOG01	3.918	93.996
ADUVEA	3.92	107.268
BOWSAJ	3.92	92.144
ADUVEA	3.921	108.248
NAXMUW	3.922	93.64
QEMHUO	3.922	146.162
UNOGEJ	3.922	104.586
ADUVEA	3.924	108.411
IGANUA	3.925	129.763
LUKWOG	3.926	93.29
PIPXUJ	3.927	123.642
NUSCEK	3.928	93.495
GOVVUL	3.929	107.369
VIPCII	3.929	169.133
XECPON	3.93	90.922
XECPON	3.93	91.166
XUCKAK01	3.932	134.694
QETWOB	3.933	114.057
UWIZOQ	3.933	98.809
EJEHEJ	3.934	95.337
ADUVEA	3.934	107.557
UGAQIF	3.934	117.214
GUGCAN	3.935	135.289
INUGOO	3.935	177.124
JAWGOE	3.935	158.75
NEPHIB	3.935	102.12
WEYZIM	3.935	166.798
IDOXUR01	3.937	108.022
EJEHEJ	3.938	95.014
SIVWUP	3.939	133.32
CEZVEL	3.942	144.993
TIPKEL	3.943	174.571
QANTIL	3.944	119.507
HUKTEM	3.945	100.375
RIDTOO	3.946	105.66
KAFREO	3.947	92.437
OJIHOG	3.948	172.513
KOCVIH	3.949	112.12
ZELVOE	3.95	104.338
IDOXUR	3.952	98.003
TUKQOI	3.952	105.455
UWOSIL	3.952	175.465
BEQWEB	3.954	170.032
WUKHUG	3.954	105.852
ZAQFOP	3.954	114.01
NABVUI	3.955	131.392
WUKHUG	3.955	147.723
EMENES	3.955	123.945
KUNGIM01	3.956	91.069
NEGLIU	3.956	93.182
TIPKEL	3.956	170.766
CIZMAC	3.959	169.007
POKFUQ01	3.959	153.816
QOJKIJ	3.959	130.675
PUYYAL	3.96	139.58
DORJEB	3.964	141.051
BEQWEB	3.966	172.986
HUJPAF	3.966	111.061
POFTOW	3.966	114.721
TUKQOI	3.967	119.765
AXUNEO	3.969	90.671
HUDSUW	3.969	136.161
NICRID	3.97	132.763
PICNIB	3.97	179.319
YEXVIJ	3.97	93.712
TAVBEA	3.971	142.442
VIXRIF	3.971	104.992
IOCYTD	3.972	102.059
SUKYOP	3.972	106.013
TECZAE01	3.972	148.896
TECZAE03	3.972	148.896
SIVWUP	3.973	136.816
CIZMAC	3.974	167.789
DUJLIF	3.974	109.291
VETQOB	3.974	145.174
VETQOB	3.974	137.167
XAHSEH	3.974	91.368
XUCKAK01	3.974	134.064
EDAGIZ	3.975	107.041
UWUDUO	3.976	158.469
SEVVIB	3.977	108.77
OPUPUN	3.977	111.836
KIMSEH	3.978	104.302
PADBAX	3.978	127
RIDTOO	3.978	104.872
YAZLUG	3.978	135.702
ORETUC	3.98	107.55
SEVVIB	3.981	108.205
USUBIW	3.981	94.948
SOZFIZ	3.982	115.538
WINQIW	3.983	166.398
HELHEN	3.985	120.252
IKUZAR	3.985	155.716
UDERUR	3.985	100.96
INUGOO	3.986	129.704
CASCAC	3.987	130.497
INUGON	3.987	103.519
UWUHAY	3.987	170.819
GOJMUP	3.988	117.822
POFTOW01	3.988	114.552
UGECEQ	3.99	123.797
BOWRUC	3.991	148.105
EDAGIZ	3.991	113.121
EJEHEJ	3.992	99.14
BOWRUC07	3.992	148.88
MUDFOH	3.992	106.385
BONLEX	3.995	127.472
VEPJAE	3.995	152.743
BOXXET	3.996	161.29
JIKHUG	3.997	91.027
IMUEAD	3.998	129.74
ZISRUQ	3.998	116.268
BEQWEB	3.999	172.791
GUWGUD	4	159.208
PUYXUE	4	107.418
VIGMEF	4	154.409
YOSBAL	4	96.845
RIRLEK	4.002	177.125
VETQOB	4.002	90.533
CADRAB	4.003	108.745
HUKTEM	4.003	113.946
PUYXUE	4.003	101.865
DUJKAW	4.004	106.379
PICNIB	4.004	128.172
SARNIL	4.004	142.524
UWUHAY	4.004	173.556
RALFAN	4.005	131.354
VOWMOM	4.005	93.523
YAHWUZ	4.006	136.373
YEZDEN	4.006	119.626
UTISAS	4.007	90.466
ZUFRAT	4.007	126.541
KAFREO	4.008	114.209
SUKYIJ	4.009	113.38
IPMSEY	4.01	91.574
XECPON	4.01	93.868
FOYMEL	4.012	157.193
VAPLOP	4.012	106.225
YEWCAF	4.012	103.019
AWEJUI	4.016	142.955
LOMGUQ	4.017	167.192
PIRGOM	4.017	104.3
UWOSIL	4.017	106.715
BOWRUC03	4.018	103.349
CIZLOP	4.018	117.119
ROTDIQ	4.019	149.627
FUPFIH	4.02	131.848
FUPFIH	4.02	131.848
VETQOB	4.02	93.776
VIPCII	4.02	125.739
WUKHIU	4.02	104.531
WUFXEC	4.022	117.781
IXOTIB	4.023	99.755
AWEJUI	4.024	142.254
TAVBEA	4.024	138.733
QEMHUO	4.025	101.846
ZIQQEX	4.025	92.453
AXUNIS	4.026	92.162
FUTYUR	4.026	108.346
PUYXUE	4.026	110.112
QEMHUO	4.026	124.117
VIHFIC	4.027	92.574
EBIMOU	4.028	109.133
DIVBOA	4.03	142.57
SEVVIB	4.03	108.826
XUXMIP	4.03	132.713
DIJDIL01	4.031	151.119
XEVWAZ	4.031	130.812
IGUANM	4.033	99.716
SUTKID	4.035	108.959
AXUNOY	4.037	104.862
DIJDIL	4.037	151.52
TECZAE	4.039	100.236
TECZAE02	4.039	100.236
CIZMAC	4.04	119.395
FUQWIZ	4.04	106.734
ZULPED	4.041	133.512
SARNIL	4.042	138.878
ISODOK	4.043	107.918
LEXNAF	4.043	91.029
WINQIW	4.043	168.382
NIZHAI	4.044	111.217
RIHKAV	4.044	122.256
TANNII	4.046	167.193
DUGVEJ	4.047	97.366
MAZCOI	4.047	170.096
WINQIW	4.047	171.293
DIJDIL	4.048	99.597
KETXIT	4.048	113.016
QOJLAC	4.048	112.003
UWUGUR	4.048	167.711
TUPRUS	4.049	93.405
DIJDIL	4.05	116.064
UGECEQ	4.05	143.831
VIGMEF	4.05	110.522
CIZMAC	4.051	101.253
GUPKOS	4.051	130.521
XECPON	4.052	94.148
TEQKIM	4.055	113.569
TUWQIO01	4.056	103.818
VIGMEF	4.056	117.175
XECPON	4.056	97.615
YIVGOA	4.056	101.391
SEVVUN	4.057	98.1
ZELVOE	4.057	108.199
DIJDIL01	4.058	99.836
PEKYUA	4.058	125.252
AWEJUI	4.059	119.489
SUJCOS	4.059	90.487
YULVOS	4.059	101.939
RENQIL	4.06	140.247
ARUSEN	4.061	95.152
XAHSEH	4.062	106.672
BOWRUC03	4.063	150.105
CIZLUV	4.063	119.035
ABEPAY	4.064	134.738
DIVBOA	4.064	96.071
TUWHOK	4.064	100.53
YAJREH	4.064	130.754
YOSBAL	4.064	146.295
LOMGUQ	4.065	91.748
NUSCEK	4.065	118.141
QADBIH	4.065	98.269
YOSBAL	4.065	121.503
AXUNOY	4.066	104.885
VAPLOP	4.066	102.503
EQUTUG	4.067	94.995
VIGMEF	4.067	165.525
YOSBAL	4.068	114.158
HOHFER	4.069	105.477
XECPON	4.069	97.12
EQUYIB	4.069	102.89
TUWQIO01	4.07	116.228
POFTOW	4.071	104.833
TUWQIO01	4.071	101.548
QINCUN01	4.072	117.772
CIZLOP	4.073	97.347
PIRGOM	4.074	91.67
VISQUK	4.074	117.555
VIPCII	4.075	144.351
OPUPAS	4.076	115.525
JETYEP	4.077	171.359
LEGVUQ	4.077	112.886
RUWRUX	4.077	140.7
EQUTIU	4.079	149.378
SANMUR	4.079	114.54
WEYZIM	4.079	94.055
DORJIF	4.08	160.256
LARHAQ	4.08	98.111
NIJFET	4.08	145.946
XECPON	4.082	97.989
POFTOW01	4.083	105.029
WUFLOY	4.083	146.251
IGANUA	4.084	129.629
YEZDEN	4.084	121.084
HUJPAF	4.085	136.111
PUYXUE	4.085	158.686
TECZAE	4.085	121.191
TECZAE02	4.085	121.191
YIDGAV	4.085	93.832
UWUHUS	4.086	90.789
IQEWIK	4.087	98.056
XAHSEH	4.087	99.504
MUGKIK	4.088	95.123
SEVVIB	4.088	109.156
HUKTEM	4.089	158.608
VIRSUM	4.089	100.929
RAQMAA	4.09	108.519
SELCUJ	4.09	155.232
PEXPEQ	4.091	172.878
WIBPII	4.091	160.337
XECPON	4.091	96.953
ZAQFOP	4.091	94.608
ENAKEL	4.093	176.975
VIRTEX	4.093	101.818
AGIGII	4.094	98.645
AXUNOY	4.094	122.022
XUHQAS	4.094	104.657
AXUNUE	4.095	110.878
CIZLUV	4.096	93.905
LARKOH	4.096	104.12
HEQKUM	4.097	169.192
TUKQOI	4.097	110.169
AWEJUI	4.098	109.71
LANJES	4.098	118.842
MEQFIX	4.098	136.396
DUJJUP	4.099	91.78
PIRGIG	4.099	91.948
QINCUN03	4.099	118.065
EJEHEJ	4.1	99.043
DUVNUG	4.1	111.48
MOSFOQ	4.1	92.698
PAPRIJ	4.1	95.397
IDUCOB	4.101	130.578
UWUGUR	4.101	169.646
CIZMAC	4.102	102.602
VIPCII	4.103	130.513
IURIDN10	4.104	93.4
EDUZOV	4.106	104.551
JETYEP	4.106	169.462
NINJOM	4.106	166.4
NEPHIB	4.107	95.334
HURYOK	4.108	98.768
XUCKAK	4.108	116.198
KEYNUX	4.109	100.037
IURIDN11	4.111	92.675
YEZDEN	4.111	107.056
WIBPII	4.116	129.958
QUWFUM	4.117	114.886
RIHKAV	4.117	107.715
UDERUR	4.117	103.765
GEBXIX	4.118	161.549
GIQQAY	4.119	106.458
ICAJIF	4.119	129.63
POCRUW	4.119	106.692
EBAQIH	4.12	146.287
PIRGOM	4.121	104.534
QINCUN02	4.121	118.392
UWOSIL	4.121	174.551
SEVVIB	4.122	113.996
ZOGVOI	4.122	126.657
HUKTEM	4.124	110.579
BONLEX	4.125	115.545
KORYAR	4.126	110.631
SUTKEZ	4.127	142.325
EBAQIH01	4.128	146.161
AWEJUI	4.129	114.928
COJXIJ	4.129	93.093
SIVWUP	4.13	121.097
PAPRIJ	4.132	123.688
OKATUR	4.133	96.654
POKFUQ01	4.133	118.645
ZIQQEX	4.133	111.366
QEYTUK	4.134	163.069
SEVVIB	4.134	110.994
SIYYEH	4.134	129.691
BOWSAJ	4.135	111.877
EBAQIH	4.135	146.034
PIPXUJ	4.135	125.494
PIRGIG	4.135	98.711
IZIPOX	4.136	145.791
VIPCII	4.136	151.16
EYOFEF	4.137	116.868
JINKOH	4.139	131.321
PAPRIJ	4.139	104.962
EDAGOF	4.14	95.039
JINKOH	4.14	132.213
JOGLEZ	4.14	91.825
LUKWAS01	4.14	96.395
PADBAX	4.14	111.373
POKFUQ01	4.14	157.821
TUWQIO	4.14	145.764
YODTET	4.142	119.937
MOSFOQ	4.143	115.655
XECPON	4.143	90.47
HEQKUM01	4.144	170.633
SEVVIB	4.144	122.983
TOYGIX	4.144	175.017
YIDGAV	4.144	91.886
ENAKIP	4.145	174.873
FUHGOF	4.145	114.18
NABVUI	4.145	120.645
JINKOH	4.146	147.957
KORXUK	4.147	120.134
KUNGIM	4.147	96.251
PEKYUA	4.147	100.324
XAHSEH	4.147	120.976
RIDTOO	4.148	130.496
UNOMIV01	4.148	97.817
BONLIB	4.149	93.533
KEZNAG	4.149	107.866
RENQIL	4.149	127.804
ZOGVEY	4.149	102.319
IMIWAE	4.15	160.723
DUGVEJ	4.151	99.538
WAVXEX	4.152	143.015
KORXIY	4.153	121.044
WEDXIP	4.154	171.816
XUCKAK	4.154	125.428
YULVIM	4.154	113.304
OXIJOX	4.155	110.275
ZUFRAT	4.156	121.427
KORXEU	4.158	112.459
RIWZIH	4.16	110.316
VUBBOM	4.16	140.352
CIZLUV	4.161	134.916
PINQIP	4.161	95.334
ZOGTAS	4.161	121.027
ELINOF	4.162	104.828
KONCOG	4.162	126.251
PIRGOM	4.162	114.644
QUSCEP	4.164	107.078
EMENES	4.164	100.509
TETKEL	4.166	107.339
EJUKUS	4.167	93.95
DUJKIE	4.167	131.485
HUJPEJ	4.167	103.713
WECQUS	4.167	136.512
PIRGIG	4.168	94.286
POFTOW	4.168	101.233
CADRAB	4.17	103.392
MOFSAC	4.171	130.669
XUXXUK	4.171	108.517
KORXEU	4.172	122.841
UYILAQ	4.172	123.53
HURYIE	4.173	142.052
LUKWAS	4.173	96.706
MOFRUV	4.173	117.765
XUCKAK	4.173	155.99
UNOMIV	4.174	98.074
VIPCII	4.174	111.354
EDAGOF	4.175	127.407
PIRGOM	4.175	149.742
POFTOW01	4.175	101.037
SUKXUU	4.175	140.346
MIFPEX	4.177	99.88
PIJZOZ	4.177	130.756
UWUHUS	4.177	118.405
KORXOE	4.178	105.058
HUJPAF	4.179	110.721
UDERUR	4.179	146.966
EHULOI	4.181	94.219
JEWYIU	4.181	129.839
FUTYUR	4.182	160.751
INUGON	4.182	91.493
CIZMAC	4.183	128.353
ISODUQ	4.186	115.316
VIZLOI	4.186	92.743
JIKHUG	4.188	104.516
ZOGTEW	4.188	97.537
YIVGOA	4.189	134.864
DUJKIE	4.191	100.4
WEDBAJ	4.191	157.128
AWEJUI	4.192	110.867
EGAFIE	4.192	100.276
SUTKEZ	4.192	104.566
GOJMUP	4.193	111.581
SIPGAZ	4.193	168.95
EGAFIE	4.194	106.765
MURXUT	4.194	130.561
SUJCOS	4.194	108.55
CUWHIO	4.195	107.102
CIZLOP	4.196	134.588
ZAQFOP	4.197	92.538
FIXYAM	4.198	148.998
QINCUN	4.198	118.949
MOSFOQ	4.199	113.298
VOBMAB	4.2	90.698
XUCKAK	4.2	140.688
YEZDEN	4.2	105.089
ELINOF	4.201	107.058
DUJJOJ	4.201	122.288
UGECEQ	4.201	107.823
XECPON	4.201	122.419
EJUKUS	4.202	95.668
DIMYUT10	4.202	109.761
KIMSEH	4.202	110.691
VETQOB	4.202	94.81
YEXVIJ	4.203	96.339
SEVVIB	4.205	125.74
ISOFIG	4.206	160.431
KOZLIW	4.206	98.615
SEVVIB	4.206	126.165
WUKSUR	4.206	95.143
IBILEK	4.207	133.073
QEMHUO	4.207	128.836
YODTIX	4.207	102.849
XIZCIU	4.208	103.952
URAPUA	4.209	110.848
MEBMAH	4.21	113.058
ZAQFOP	4.211	149.005
DUMCAS	4.215	103.003
HUJPEJ	4.215	137.804
ZATFOR	4.215	101.022
ZZZFGA01	4.215	110.011
YEZDEN	4.216	105.448
VIGMEF	4.218	99.052
COJXIJ	4.219	90.54
DUSGEG	4.219	112.356
ORETUC	4.219	110.371
QIHCEP	4.219	114.353
RAFLOC	4.219	98.862
ATIRIE	4.22	137.892
DORJOL	4.221	166.49
LEXSEN	4.221	147.698
YEZDEN	4.221	104.282
YEZDEN	4.221	124.001
CALIFI	4.222	96.861
HUDSUW	4.222	95.487
OQERAE	4.223	91.139
LOZMES	4.224	134.564
MOSFOQ	4.225	114.868
SUJCOS	4.226	108.613
UNUYAF	4.226	130.439
ULIDEZ	4.227	131.859
RAFLOC	4.228	142.576
DUJJOJ	4.229	116.651
MOSGAD	4.229	126.819
EDUZOV	4.23	115.154
TUHBOO	4.23	132.312
KORXUK	4.231	90.955
KORYAR	4.234	115.7
KOZLIW	4.234	101.665
LOMGUQ	4.235	162.902
XAHSEH	4.235	109.191
AJOSIE	4.236	122.632
OXIJOX	4.236	106.482
VIXROL	4.237	127.095
HIDRER	4.238	121.392
MANDIA10	4.24	111.183
XECPON	4.24	122.705
YOSBAL	4.241	122.712
POFTOW	4.242	92.752
BOWRUC03	4.244	102.862
NINJOM	4.244	124.319
RIHKAV	4.245	152.437
SOCJOJ	4.245	110.021
EDAGOF	4.247	91.807
ISODOK	4.248	100.983
SUKPAR	4.248	115.313
SANMUR	4.249	112.63
VIHFIC	4.25	117.292
ZELVUK	4.25	101.829
KORXEU	4.251	119.984
PINQIP	4.251	112.218
XECPON	4.251	99.774
ZELVUK	4.251	93.074
CIVXAJ	4.252	134.883
LEXNAF	4.252	109.036
YEZDEN	4.252	104.189
YIVGOA	4.253	103.277
NABVUI	4.255	119.805
NAXMUW	4.255	112.649
SELZIT	4.256	153.79
ICAJIF	4.257	100.216
EJULIH	4.258	98.051
MOSFOQ	4.258	97.342
NELJIY	4.258	106.375
DIJDIL	4.259	143.953
ENAKAH	4.259	176.317
GUWGIR	4.259	101.182
EJEHEJ	4.26	123.143
EJEHEJ	4.26	124.617
MEBMAH	4.261	97.501
UDERUR	4.261	101.628
CIJSIX	4.262	123.402
HEZQEK	4.263	97.791
ZAQFOP	4.263	148.824
UJADUF	4.264	129.46
OWEZOH	4.265	150.45
ICILEL	4.266	138.266
WITXEE	4.266	101.644
DOPWEM	4.27	118.227
MOFSAC	4.272	91.521
VEDYOU	4.272	125.289
QEMHUO	4.273	119.019
XUCKAK	4.273	112.537
IGANUA	4.274	124.486
NUSCEK	4.274	112.532
PADBAX	4.274	103.732
PIRGOM	4.275	151.203
REMWEL	4.276	158.132
HURYOK	4.277	136.029
VIZLIC	4.277	97.425
POFTOW	4.279	123.876
DIJDIL	4.28	114.218
DIJDIL01	4.28	114.422
WITXEE	4.28	101.992
XECPON	4.28	100.288
YILZEA	4.28	135.019
POFTOW01	4.281	92.65
YIVGOA	4.282	110.697
XECPON	4.283	121.395
ZOGTAS	4.283	135.65
DOBMOX	4.285	92.51
XUCKAK	4.285	132.908
TECZAE01	4.286	102.854
TECZAE03	4.286	102.854
WIYBAI	4.286	156.476
YOSBAL	4.287	172.911
HIPPEB	4.288	175.13
EQUYIB	4.289	112.43
XECPON	4.29	122.977
PEKYUA	4.291	106.59
XOMROJ	4.292	165.085
SEVVIB	4.293	115.678
ZAQFOP	4.293	97.93
ENAKAH	4.295	95.26
MAWXAM	4.295	95.113
UWOSIL	4.295	90.367
LOZMES	4.296	118.117
SUWYOZ	4.297	90.571
DUGVEJ	4.298	141.654
IMUEAD	4.301	100.389
TIPKAH	4.301	109.223
DOBMOX	4.302	144.992
ISOFEC	4.304	118.8
VIPCII	4.305	158.668
DIVBOA	4.306	128.655
REDBIM	4.308	103.773
TIPKEL	4.308	121.925
ZOBBAV	4.308	117.983
ELINOF	4.31	105.825
XOMROJ	4.31	163.123
FIKSAW	4.311	136.125
LEMZUZ	4.311	107.344
SUJCOS	4.311	113.395
HELGUC	4.312	112.279
QANTIL	4.314	103.417
HIDRER	4.316	126.804
PADBAX	4.316	137.55
VOBMAB	4.316	102.596
ZIZZUF	4.316	140.334
UWOSIL	4.316	90.635
QEMHUO	4.317	111.266
EGAFIE	4.318	129.475
IXMASO	4.319	110.546
WUKSUR	4.319	153.292
KOVGEH	4.32	103.972
POFTOW	4.32	109.517
KOZLIW	4.321	106.364
EHULOI	4.322	90.281
UDERUR	4.323	94.284
KEGXIE	4.325	124.407
OJUFAB	4.325	111.548
VOBLUU	4.325	103.253
POFTOW01	4.326	109.711
TIKTUE	4.326	150.711
GASPIA	4.327	152.769
VIHFAU	4.328	110.032
XECPON	4.328	118.787
JINKEX	4.33	155.484
JOYHIQ	4.33	128.832
USUBIW	4.33	110.184
DIJDIL01	4.331	127.956
LEXNAF	4.331	170.835
SUJCOS	4.331	150.332
QOJKUV	4.333	152.309
AQEJIQ	4.334	165.059
DIJDIL	4.334	128.127
VIXLAR	4.334	134.268
ZOGTEW	4.334	100.48
QAMYIO	4.336	106.795
CIZMAC	4.337	128.496
EBIMOU	4.337	169.536
SARNIL	4.338	139.809
VIGMEF	4.338	108.577
DIMCXD	4.339	112.328
ISODOK	4.339	99.015
LOZMES	4.339	118.648
YODTIX	4.339	118.141
QEYTUK	4.34	163.11
TUKQOI	4.34	127.151
EDAGOF	4.341	102.767
XOMROJ	4.342	122.399
GASHAM	4.343	93.67
QADBIH	4.343	151.764
POKFUQ01	4.344	120.042
ULIDEZ	4.344	92.105
ATIRIE	4.346	98.949
GUWGUD	4.346	99.291
GUWXAZ	4.346	94.14
WOJQOB	4.346	98.666
NELJIY	4.347	107.315
IDUCOB	4.348	121.668
QOJKOP	4.348	110.909
SOZFIZ	4.348	96.423
YAZLUG	4.348	98.088
ZOGSUL	4.348	99.078
AXUNUE	4.349	112.67
PEKYUA	4.349	176.709
XOMROJ	4.349	121.163
KORXEU	4.354	150.082
EJULIH	4.355	92.296
EGAFIE	4.355	93.843
KIMRIK	4.355	112.944
KUNGUY	4.357	123.955
MAWXAM	4.357	104.717
SARNIL	4.358	147.147
TEXTOI	4.358	94.223
VIGMEF	4.358	118.385
GIJFAJ	4.36	116.11
GUZKIW	4.36	101.204
YAHXAG	4.36	110.603
ZOGTEW	4.36	105.159
QEKZUB	4.361	97.078
YAJREH	4.362	98.191
RIDTOO	4.363	109.623
SUKYIJ	4.363	150.536
EPOLIA	4.365	152.609
ICILEL	4.365	148.234
KETWUE	4.365	117.755
VISQUK	4.366	153.545
XECPON	4.366	119.587
YONHIV	4.366	90.218
IPMSAL10	4.368	152.579
YEZDEN	4.368	103.292
GOJMUP	4.369	132.985
ZIZZUF	4.369	158.247
ISOFOM	4.37	127.926
LACDAV	4.371	110.654
POKFUQ01	4.371	116.746
SEVVIB	4.374	113.923
ZAQFOP	4.375	103.292
XUHQAS	4.376	121.497
DIJDIL01	4.377	103.535
RIDTOO	4.379	92.482
UWIZOQ	4.379	147.97
DORJEB	4.38	96.404
FUTYUR	4.38	92.874
NABVUI	4.38	141.463
SIKLEG01	4.38	95.617
VEDYOU	4.38	105.982
POJXER	4.381	137.389
LEGVUQ	4.382	110.712
PIPXUJ	4.382	108.63
YOSBAL	4.382	95.339
CIZLUV	4.383	112.687
KETWUE	4.383	108.135
CIZMAC	4.384	126.505
HIDRER	4.384	93.209
JEWYIU	4.384	131.063
YAHXAG	4.384	95.414
JINKOH	4.386	97.636
IGANUA	4.387	108.148
PEKYUA	4.387	131.429
DOPWEM	4.388	99.501
VAPLOP	4.388	165.094
ZOGSOF	4.388	119.704
MEJQIC	4.389	104.234
POKFUQ01	4.39	161.448
OPUVEC	4.391	100.033
SELCUJ	4.391	102.987
TECZAE01	4.392	94.799
TECZAE03	4.392	94.799
ISODOK	4.393	120.447
ROTDIQ	4.393	116.027
POFTOW01	4.394	110.88
GEBLEE	4.395	128.605
QUQQAW	4.395	140.401
GOJMUP	4.397	95.544
MIFPEX	4.397	125.505
QOJKUV	4.398	139.55
RIBWUV	4.398	119.901
FUHGOF	4.399	145.394
SUKYOP	4.399	91.184
BERZED	4.4	96.767
ZOGSOF	4.4	98.412
CEZVEL	4.402	94.858
TECZAE	4.403	144.67
TECZAE02	4.403	144.67
ICILIP	4.404	140.894
LUNKOW	4.404	133.132
BOWSAJ	4.405	104.618
ISOFAY	4.405	106.839
NUSCEK	4.407	135.575
UGICAR	4.407	107.64
YIDGAV	4.407	131.38
OJIHOG	4.408	94.398
COLXUY	4.409	111.094
DUSGEG	4.409	121.633
LUKVUL	4.409	97.411
QANTIL	4.41	90.187
TETKEL	4.412	124.289
HEZQEK	4.414	131.413
XECPON	4.415	101.256
CIZMAC	4.416	95.549
JINKOH	4.417	119.124
XECPON	4.417	116.959
CIYYAL	4.418	98.142
DUVNUG	4.419	92.676
UNOMIV01	4.421	127.763
UXEVAV	4.421	112.652
WINQIW	4.421	118.487
IMVPIP	4.422	91.145
KAFREO	4.423	137.066
UYIRUR	4.424	91.348
ZAQFOP	4.424	158.425
CADRAB	4.425	97.945
TUPRUS	4.425	111.915
FIKSAW	4.426	128.234
GEBXIX	4.427	133.497
ZAQFOP	4.428	156.208
VUBBOM	4.429	133.88
EHIXIF	4.43	127.915
EJEHEJ	4.43	126.525
DIMCXD	4.431	114.986
QAMYIO	4.432	104.112
SIVWUP	4.433	151.015
UNOMIV	4.433	128.148
AWEJUI	4.434	138.601
DOPWEM	4.434	107.955
EBAQIH	4.436	129.736
GIQQAY	4.436	141.423
HUDJOF	4.436	122.333
JINKOH	4.436	170.138
LAZPEI	4.437	145.5
EBAQIH01	4.439	129.811
SIKLEG	4.439	95.676
EBAQIH	4.441	129.885
FUHGOF	4.441	136.902
VAPLOP	4.442	108.111
HEZQEK	4.443	136.396
ORETUC	4.443	94.728
PIRGIG	4.443	98.102
MOSFOQ	4.444	111.358
XECPON	4.444	119.814
POKFUQ01	4.445	106.056
DIVBOA	4.446	96.706
QANTIL	4.447	104.186
DUGVIN	4.448	98.385
KORXUK	4.448	130.951
HIDRER	4.449	92.014
RAFLOC	4.449	154.859
DIMYUT10	4.451	96.861
RIDTOO	4.452	92.486
LEXSEN	4.453	110.785
QEKZUB	4.453	99.388
TIJXOA	4.453	121.89
CIFGOO	4.454	113.492
BOWRUC02	4.458	98.55
ENAKEL	4.458	111.914
GIWTIQ	4.458	137.32
RIDTOO	4.459	117.174
IGANUA	4.46	136.793
MUFDEZ	4.46	108.849
VIPCII	4.462	134.828
XECPON	4.464	99.254
HELGUC	4.465	107.878
NABVUI	4.465	106.362
TUWQIO01	4.465	94.938
DIJDIL01	4.467	96.097
GIYLIK	4.467	115.868
DUJJOJ	4.468	102.207
ZIQQEX	4.469	107.256
QANTIL	4.47	114.078
DIJDIL01	4.471	143.864
YAZLUG	4.471	103.813
ZOBBAV	4.471	158.235
KORXOE	4.472	135.632
XIZCIU	4.472	137.156
VERCIA10	4.473	136.53
DOJDIR	4.474	166.393
GASHAM	4.474	121.993
QADBIH	4.474	103.176
UGICIZ	4.475	118.815
CIZMAC	4.476	92.597
SIVWUP	4.476	131.278
CEZVEL	4.477	162.316
GIYLIK	4.477	115.275
RIFIAN10	4.477	97.734
UNOMIV01	4.477	97.012
BOWRUC03	4.479	155.704
UDERUR	4.48	142.05
HILTOM	4.481	117.682
LEXNAF	4.481	106.55
QEKFOB	4.481	134.584
DIJDIL	4.482	96.164
EJEHEJ	4.483	139.406
UTISOG	4.484	139.512
PIPXUJ	4.485	127.1
COJXIJ	4.486	113.033
YAZLUG	4.486	100.771
CIZLOP	4.487	119.072
BOWRUC02	4.488	101.085
HUDJOF	4.488	144.485
KORXIY	4.488	91.238
RIDTOO	4.489	101.465
YEWCAF	4.489	95.994
KEWHOL	4.49	120.595
DUGVIN	4.491	153.505
OJILAW	4.491	105.43
SUJCOS	4.493	143.046
CEZVEL	4.494	146.007
OSOPIY	4.494	146.673
NABVUI	4.495	116.45
QEKFOB	4.495	98.032
QIHCUF01	4.495	145.833
TUKQOI	4.495	103.04
POKFUQ01	4.5	161.743
QANTIL	4.5	103.92
QEKZUB	4.5	119.907
QEMHUO	4.501	155.799
VIXREB	4.501	104.9
MUDFOH	4.504	163.388
SUJCOS	4.504	103.04
SUTKID	4.506	150.348
EBIMOU	4.51	94.078
KETWIS	4.51	105.612
PIRGOM	4.51	90.79
QAMYIO	4.511	108.493
LOZMES	4.513	161.101
MOZTED	4.513	117.355
QUSCEP	4.514	104.296
XEPPAJ	4.514	153.317
LAZPEI	4.516	90.886
BOWRUC02	4.518	105.198
HURYIE	4.518	118.184
YIVGOA	4.518	155.532
WEWVUS	4.519	116.141
MADWIB	4.52	93.145
FUPFIH	4.52	158.242
IXUYAD	4.52	91.356
SEVVIB	4.52	122.752
UNOMIV	4.52	96.776
BOWRUC03	4.521	170.694
SARNIL	4.522	98.826
WEYZIM	4.522	102.899
WISBIL	4.522	117.083
MIFPEX	4.523	138.808
WITXEE	4.523	92.014
WUKHIU	4.526	105.839
DOPWEM	4.527	153.94
TIPKAH	4.527	108.999
WITXEE	4.527	98.677
LAZPEI	4.528	113.041
ZAQFOP	4.529	111.111
GUWGUD	4.53	116.238
SELDAQ	4.53	98.984
SUKYOP	4.531	130.149
TIPKAH	4.531	120.675
DIMCXD	4.535	124.933
VIGMEF	4.535	104.762
ECARIL	4.537	108.774
WITXEE	4.538	92.239
XIDDEW	4.539	166.338
VERCIA10	4.54	145.054
XIBJOH	4.54	92.76
SEVVIB	4.542	132.102
WEDXIP	4.543	126.247
WUKHIU	4.543	153.442
YILZEA	4.543	110.388
BOWREM	4.545	128.147
OQISOY	4.545	115.391
COJXIJ	4.547	102.811
FUPFIH	4.547	116.982
HILTOM	4.549	99.532
UTENUE	4.549	116.213
PUYXUE	4.55	135.88
GEBXIX	4.552	118.592
WUKHUG	4.553	120.414
WITXEE	4.555	99.104
ZZZFGA01	4.555	153.848
UYUZIA	4.555	136.545
CEZVEL	4.556	108.672
WIYBEM	4.556	147.237
EYENUS	4.557	94.243
LEXSEN	4.557	90.658
GIWTUC	4.559	151.174
EJEHEJ	4.56	140.023
KEGXIE	4.56	104.86
KORXOE	4.56	90.717
LEGVUQ	4.56	120.378
PICNIB	4.56	134.597
RUWRUX	4.56	158.852
RUWRUX	4.56	94.179
ZILBIF	4.56	112.147
HUHJIE	4.561	163.721
MEQFIX	4.562	117.812
AXUNOY	4.563	116.983
AFIBAT	4.564	110.64
PAPRIJ	4.565	113.321
PUGLEJ	4.565	175.735
VIXROL	4.565	120.888
VIXROL	4.568	123.029
TUWQIO	4.569	165.482
VEJPUY	4.569	99.781
XOFBEC	4.569	141.146
CASLIT	4.57	109.856
MOFSAC	4.57	109.662
ISODOK	4.571	120.557
PEXPEQ	4.575	92.347
NOLGEA	4.576	132.952
OKOGOL	4.576	166.338
LEMZUZ	4.577	143.398
SIKLIK	4.577	94.229
WUKHIU	4.577	153.11
POCRUW	4.578	162.449
UTISOG	4.578	103.069
WEDYIQ	4.578	128.936
KUNGUY	4.579	107.578
QOJKOP	4.581	103.942
JUWMOF	4.584	146.564
YEZDEN	4.584	166.797
OPUNUK	4.586	112.189
VIZLIC	4.586	146.1
ZUFRAT	4.586	110.414
MAWXAM	4.587	112.307
OSOPIY	4.587	95.559
HUDSUW	4.588	112.002
MUFDAV	4.588	105.871
SIKMAD	4.588	97.043
CEZVEL	4.589	123.973
LARHAQ	4.589	142.294
YEZDEN	4.589	167.063
EJEHEJ	4.59	128.082
TIETHE04	4.591	111.019
OPUVEC	4.593	118.463
TUPRUS	4.593	97.359
DIJDIL	4.594	131.663
HOHFER	4.594	105.97
PIPXUJ	4.594	111.962
TIPKAH	4.595	118.761
RAQMAA	4.596	105.958
YEZDEN	4.596	164.032
MEFFUZ	4.597	145.584
GEBXIX	4.599	156.495
ROTDIQ	4.6	108.604
QETWOB	4.601	134.219
WOWXOY	4.601	95.901
YAHWUZ	4.603	137.04
NOQHAF	4.605	113.895
SARNIL	4.605	101.049
SIKKUV	4.605	95.641
AXEQAV	4.606	145.722
BOWSAJ	4.606	93.435
KIMSEH	4.606	112.396
QEMJAW	4.606	117.803
MEJQIC	4.608	119.567
CEDRIA	4.609	133.527
GUWGIR	4.609	126.87
UWUDUO	4.61	119.811
GASPIA	4.611	98.799
SANMUR	4.611	161.919
EBIMOU	4.612	107.987
YEZDEN	4.612	169.153
BAXVIG	4.613	110.007
INUGON	4.613	151.391
UNOGEJ	4.614	141.628
NEPHIB	4.615	158.063
WIBPII	4.615	117.795
KORXEU	4.616	106.277
FUPDUR	4.617	94.291
AWEJUI	4.618	132.018
ISOFIG	4.62	124.295
ORETUC	4.62	99.152
TIPKEL	4.62	108.52
WUKHIU	4.62	92.059
EDAGOF	4.622	116.15
GEBXIX	4.622	97.994
TIPKEL	4.622	121.57
BOWREM	4.623	125.1
CIZLOP	4.623	98.982
FETMOG	4.623	127.737
NABVUI	4.623	112.939
IZITAP	4.623	119.826
INUGON	4.624	132.843
NELJIY	4.624	111.242
QOJLAC	4.624	109.696
TIETHE01	4.624	152.287
CAWJOZ	4.626	94.267
EHULOI	4.626	118.877
SIKLOQ	4.626	96.929
YULVIM	4.626	102.224
ZUFRAT	4.626	107.911
KORXIY	4.627	150.057
TUKQOI	4.627	104.591
ZOGSUL	4.627	98.332
EDAGOF	4.628	94.222
ICILEL	4.628	171.189
TIETHE04	4.628	160.681
QENZIV	4.63	138.445
WUKSUR	4.63	116.085
CACHOD	4.632	160.139
CASCAC	4.632	93.776
ICIMEM	4.632	134.716
CEZVEL	4.633	98.997
COJXIJ	4.633	142.36
BOLEIA	4.634	117.679
MADVOG	4.635	134.22
VAFXIK	4.635	135.852
VUXGIG	4.635	122.505
YEZDEN	4.635	166.154
HILTOM	4.636	119.917
SIKLUW	4.636	98.564
VAPLOP	4.638	119.629
XITVAY	4.638	114.21
CIZLOP	4.639	113.996
IDUCOB	4.639	160.916
DORJOL	4.64	107.343
HUDJUL	4.64	96.969
SEVVIB	4.64	125.413
COLXUY	4.641	160.468
ZILBIF	4.641	106.997
DIJDIL01	4.643	134.454
RAFLOC	4.643	133.241
KOCVIH	4.644	124.332
REMWEL	4.644	114.907
INUGOO	4.646	177.057
ZIZZUF	4.646	168.481
OPUVIG	4.647	104.339
VOBLUU	4.647	127.936
UWUDUO	4.647	109.778
YEZDEN	4.648	166.625
WAVXUN	4.649	92.073
ICILEL	4.65	178.164
INUGON	4.652	99.273
WOWXIS	4.652	97.735
ICAJIF	4.653	149.571
MEFFUZ	4.653	143.168
QANTIL	4.653	114.728
SIKLIK01	4.654	98.238
CIZLUV	4.655	141.24
XAHSEH	4.655	111.236
POKFUQ01	4.656	106.658
BOWRUC03	4.657	144.009
WUKHIU	4.658	100.146
JINKOH	4.659	102.834
KORXOE	4.659	136.741
DIJDIL	4.66	134.6
DORJIF	4.66	115.927
XUWVIU	4.66	144.374
YODTIX	4.66	102.183
GIWTIQ	4.661	113.978
LEXSEN	4.661	113.591
AGIGII	4.662	92.666
JOYHIQ	4.662	150.714
MUGKIK	4.664	92.702
ULIDEZ	4.664	108.165
WITXEE	4.664	117.29
XUCKAK01	4.665	126.904
DIMYUT10	4.666	103.315
IGANUA	4.666	100.505
SUKXUU	4.666	105.788
VUBBOM	4.666	92.63
ECARIL	4.667	96.967
RADVAU	4.667	121.021
NOQHAF	4.668	92.137
ZOGTEW	4.668	102.319
QOJLAC	4.669	98.408
UNOMIV01	4.669	141.721
YAZLUG	4.67	116.293
ZIRKIX	4.67	114.298
BOWRUC03	4.672	122.456
WEWVUS	4.672	111.539
COJXIJ	4.673	111.922
LUNKOW	4.674	121.413
VEJPUY	4.674	125.193
IDUCOB	4.676	100.361
OPUVIG	4.676	103.308
QEMHUO	4.676	109.013
UNOZUT	4.676	128.693
YEXVIJ	4.676	162.237
KOYNUH	4.677	114.788
LOZMES	4.679	152.802

## Sheet: Triple bonds
NAME	DIST1	ANG1
LEBZAW	3.204	176.911
AVIYEK	3.308	170.691
AVIYEK	3.323	166.724
DIACET01	3.336	173.186
ABEKAW	3.352	140.765
ABEKAW	3.354	139.366
TEXTAU	3.354	170.352
EPIXUZ	3.36	173.935
DIACET01	3.366	173.313
UMADOE	3.374	177.58
DIACET	3.384	164.561
CUPMEI	3.396	170.622
SICFES	3.397	179.203
AVIYEK	3.402	170.878
AVIYEK	3.411	158.344
FABWOX	3.417	175.997
GABZUI	3.423	165.363
CIKZOO01	3.425	159.18
AVIYEK	3.426	159.795
BOBGUV	3.427	176.175
HUDZAJ	3.429	163.482
UYIRAX	3.429	151.458
RAXKOR	3.443	172.043
AVIYEK	3.451	167.419
DIACET	3.453	164.625
CIKZOO01	3.454	159.727
FABWAJ	3.471	175.841
CIKZOO01	3.478	141.489
CUPMEI	3.496	167.645
XAGXAG	3.499	154.416
DOQWEO	3.503	169.025
VAWYOK	3.517	166.821
KIVBUP	3.519	135.994
HOWWUN	3.524	154.096
LUNLIR	3.526	146.503
CIKZOO01	3.529	147.412
SOKCUT	3.542	138.937
XUWWOD	3.542	163.268
CUPMEI	3.549	166.042
JOHGEU	3.56	142.742
LAYVUF	3.569	138.413
REZQOF02	3.57	141.339
DUHCAM	3.585	170.751
CIKZOO01	3.593	146.725
RAXKOR	3.593	167.413
XUWWAP	3.596	147.813
CIKZOO01	3.605	139.646
EQUDIF	3.607	136.086
XUWXAQ	3.611	148.502
REZQOF03	3.614	138.783
DUDQAW	3.619	155.691
AVIYEK	3.629	154.439
CUPMEI	3.635	166.253
AVIYEK	3.636	153.721
REZQOF03	3.646	142.646
REZQOF03	3.646	144.023
REZQOF02	3.653	145.732
REZQOF02	3.656	143.906
NITSER	3.663	108.95
WITXEE	3.677	141.129
KIVCIE	3.68	142.173
WITXEE	3.68	141.149
REZQOF02	3.681	141.814
PUZHUQ	3.684	142.744
EQUDIF	3.691	135.071
OLOHOP	3.697	146.922
KIVBUP	3.7	138.795
OLOHUV	3.704	138.218
KIVCEA	3.708	142.616
XIBPAC	3.716	144.24
IFOGUH	3.717	176.936
REZQOF01	3.718	150.23
QOWQOL	3.719	92.825
QOWQOL	3.719	99.129
OLOHUV	3.72	138.124
LENXEK	3.726	149.872
RADHOW	3.731	115.768
KIVCAW	3.732	146.491
REZQOF01	3.732	151.221
UXATUL	3.733	138.537
KIVCIE	3.738	137.543
OLOWOE	3.75	140.814
RADHOW01	3.752	116.16
WITXEE	3.752	131.062
PUZHIE	3.757	142.113
KIVBUP	3.758	137.189
XASWOD	3.758	155.802
REZQEV	3.76	145.04
PUZHIE	3.768	147.535
KIVCEA	3.77	140.556
KIVCIE	3.774	91.47
PUZHIE	3.777	145.231
PUZJAY	3.78	144.067
KIVCAW	3.781	143.315
PUZHIE	3.782	140.171
KIVBUP	3.787	141.596
PUZJAY	3.787	137.803
RETRIR	3.79	168.175
WITXEE	3.793	130.844
JEDWEX	3.796	133.742
TOJBUQ	3.804	102.306
YAPCUP	3.808	144.997
OLOHUV	3.809	143.857
KIVCAW	3.81	143.659
OLOHUV	3.815	146.321
OLOHOP	3.817	134.761
DUDPOJ	3.82	112.29
CUPMIM	3.821	93.413
RUFZEA	3.822	93.036
REZQOF	3.833	108.749
LEBYOJ	3.836	177.223
OLOWOE	3.842	142.344
YAPCOJ	3.843	115.159
KORPIT	3.844	90.827
PUWXEM	3.849	127.851
KIVCIE	3.85	144.579
IHUMON	3.853	125.161
MEKNUM	3.857	149.85
KIVCAW	3.861	144.96
JOHFOD	3.863	95.99
REZQOF01	3.875	115.891
IFOGUH	3.877	116.579
IHUNUU	3.879	95.16
WUFROH	3.882	132.225
CUPMIM	3.883	92.64
REZREW	3.884	126.785
REZREW	3.889	123.834
NIDHIU	3.89	136.853
REZREW	3.89	125.885
GUFBOY	3.893	144.868
OLOHUV	3.896	112.395
IPABAE	3.897	140.431
YAPCOJ	3.899	97.525
REZQOF02	3.9	125.272
BISBOW	3.914	102.259
REZREW	3.914	123.638
KIVBUP	3.917	120.17
REZREW	3.918	124.771
KIVCAW	3.921	92.089
KORQIU	3.922	104.664
EHAGOM	3.926	133.024
PUZHUQ	3.926	147.393
IFOGUH	3.93	96.014
IPABAE	3.933	131
PUWXEM	3.933	124.276
IPABAE	3.934	143.037
KIVCIE	3.934	145.147
REZQOF01	3.938	119.07
TEXTAU	3.939	144.811
IBUYUC	3.942	92.606
KIVBUP	3.95	132.633
XUQZER	3.952	126.007
DUDQAW	3.956	141.741
KIVBUP	3.958	122.423
XISFEN	3.961	91.194
KIVCEA	3.966	105.558
REZQOF	3.969	111.816
RETRIR	3.972	173.297
VIDTIN	3.974	106.512
UNOVIF	3.978	112.023
AYUBII	3.978	114.572
REZQOF02	3.98	128.432
REZQOF01	3.985	118.289
LUNKUC	3.986	152.207
IHUNUU	3.989	98.062
KIVCIE	3.993	117.27
GOGTAZ	3.996	119.831
KIVBUP	3.997	102.379
KORPIT	3.998	92.594
MEKMAR	4.002	139.782
NOQQAO	4.003	104.69
REZQOF	4.006	133.248
REZQOF	4.007	117.508
LUNLAJ	4.008	150.936
KIVBUP	4.01	118.753
QOWQOL	4.01	102.188
OLOWOE	4.01	121.348
NOQQES	4.014	102.547
EQUDIF	4.016	148.617
ZEHRUC	4.017	99.019
REZREW	4.021	124.164
IPABAE	4.027	124.507
UXATUL	4.03	117.892
ICACEN	4.031	90.679
IFOGUH	4.034	92.972
COHYUU	4.035	96.19
WITXEE	4.035	134.468
WITXEE	4.036	134.336
BULTAG	4.039	90.526
EQUDIF	4.041	120.909
GUZKIW	4.042	139.614
RESRAI	4.043	138.182
WANPIL	4.045	90.04
GACBEV	4.048	130.137
XASWOD	4.05	92.993
WANNOP	4.051	110.124
KIVCAW	4.054	128.01
NEZVAR	4.054	114.546
NEZVAR	4.054	90.993
CARXUQ	4.055	165.128
LAYVUF	4.056	94.277
LAYWAM	4.057	115.588
SEVVOH	4.057	143.495
ZEHSOX	4.061	114.205
MASVUZ	4.063	94.64
PUWXEM	4.065	135.157
KIVBUP	4.066	124.377
KIVCAW	4.066	98.663
NIKRAD	4.067	116.724
REZQOF	4.067	128.156
KIVCIE	4.083	116.239
KIVCEA	4.085	126.182
QEXBON	4.085	146.671
RUFZEA	4.086	110.695
NIDHIU	4.089	123.258
XIBPAC	4.095	118.762
REZQOF	4.101	134.932
REZQOF01	4.103	127.474
REZQOF03	4.106	104.782
OLOHOP	4.108	127.427
QUNPEW	4.109	132.459
UPIZAX	4.109	104.811
IBUYOW	4.12	91.28
KIVCAW	4.12	125.569
IFOHAO	4.121	118.414
BIGCIE	4.122	136.349
PUWXEM	4.122	135.955
SEVVIB	4.122	120.45
DIACET01	4.124	116.633
GULYOB	4.125	91.314
COHYUU	4.126	106.405
IFOGUH	4.131	108.373
WANPIL	4.131	114.058
CARXUQ	4.132	165.871
QOVQIE	4.133	132.262
KIVCIE	4.136	121.717
OLOHUV	4.136	130.934
EQUDIF	4.139	127.851
XAYLOB	4.141	127.149
SEVVIB	4.142	123.427
XAXNUI	4.144	91.803
OLOHUV	4.144	127.754
OLOWOE	4.147	101.38
KORPIT	4.148	98.548
GUFBOY	4.15	145.507
LEBYOJ	4.151	110.993
NUXHUM	4.154	149.01
REZQOF02	4.156	106.449
SEVVIB	4.156	119.63
IMOQOT	4.158	107.473
CEKFUU	4.159	103.655
IFOGUH	4.161	136.87
SEVVIB	4.161	122.414
UYIRUR	4.165	96.314
NAKXEG	4.167	140.284
NEZVIZ	4.167	99.806
KIVBUP	4.168	146.373
KIVBUP	4.169	91.795
KIVCAW	4.17	97.518
DIACET01	4.171	117.332
KIVJUX	4.175	157.503
RUFYUP	4.178	98.643
GOGTAZ	4.179	122.713
KIVCAW	4.18	127.564
UPIZAX	4.183	105.406
KIVCEA	4.185	114.013
TEXTAU	4.185	107.984
KETXIT	4.186	104.269
RUFYUP	4.186	106.887
OLOHUV	4.186	110.994
IFOGUH	4.188	112.422
SEVVIB	4.188	119.932
GABZUI	4.189	176.703
KIVBUP	4.19	96.436
MASVUZ	4.19	95.769
GUXLIV	4.193	136.399
HOWXEY	4.193	94.78
REZQAR	4.196	130.057
TEXTIC	4.196	122.354
UPIZAX01	4.198	106.113
XUQZER	4.199	127.17
IMOQOT	4.206	111.327
WITXEE	4.209	125.763
USOVAB	4.211	92.136
KIVCAW	4.214	100.936
LAYWAM	4.214	111.942
WITXEE	4.218	125.645
TUKNUL	4.219	115.432
TUKNUL	4.219	92.892
RESRAI	4.22	135.341
GACBAR	4.222	115.837
GACBIZ	4.222	107.011
COHYUU	4.222	101.969
KIVCAW	4.222	125.331
NEZWIA	4.224	117.524
TEXTAU	4.229	97.332
TADKAK	4.23	114.814
SICFES	4.231	92.295
SEVVUN	4.232	125.908
TEXTIC	4.234	123.441
KIVCEA	4.237	123.577
WANNUV	4.237	107.171
JOHGEU02	4.238	91.547
IMORUA	4.239	118.368
NOQQAO	4.24	97.163
TEXTAU	4.24	105.607
KORQIU	4.248	118.42
TEXSUN	4.249	101.843
KIVCIE	4.252	100.8
XAYLOB	4.254	115.871
XISFEN	4.255	107.223
OLOHUV	4.256	119.574
RUFYUP	4.264	104.807
RUFZEA	4.264	105.461
XUQZER	4.264	96.255
KUXBUC	4.272	105.444
ZUPHEA	4.28	94.558
KIVCAW	4.281	99.506
IHUMON	4.283	119.181
CHXIAC	4.285	104.295
GUZKIW	4.286	146.8
IHUMON	4.287	114.46
KUSFAI	4.293	140.421
PUJNIU	4.294	90.331
SEVVIB	4.294	123.62
XIDGAU	4.295	95.677
KIVCEA	4.299	127.012
XUQZER	4.3	132.411
KIVBUP	4.301	159.63
OBEFIL	4.302	112.305
CEKFUU	4.303	107.672
GACBEV	4.308	106.38
KIVCIE	4.309	124.254
CEKFUU	4.31	106.701
NAKXIK	4.315	140.03
NEZWIA	4.317	114.128
KIVBUP	4.323	118.063
IMOQOT	4.323	100.648
HOWXAU	4.327	97.07
KIVCEA	4.327	125.791
OBEFIL	4.327	110.977
TEXTOI	4.328	120.714
JOHGEU02	4.329	110.778
IADISE	4.331	116.108
NEZTUJ	4.332	90.168
IFOGUH	4.336	110.564
KIVCAW	4.345	124.782
NUHDEB	4.356	121.133
REZQOF02	4.357	111.001
KORPIT	4.358	110.647
TEXTUO	4.361	121.403
RESRAI	4.362	93.173
REZREW	4.364	97.591
SICFES	4.364	106.37
PERWIS	4.367	93.449
NEZVEV	4.369	112.739
NEZVEV	4.369	94.062
USUFEV	4.379	94.072
QEXBON	4.38	106.739
KIVCEA	4.381	103.083
XUWWAP	4.385	99.193
XUWWAP	4.386	113.465
LEBYUP	4.395	98.351
XAYLOB	4.403	109.364
SABJOY	4.405	111.366
WANNUV01	4.405	96.015
HOWXEY	4.41	140.891
KIVBUP	4.41	127.412
KIVBUP	4.41	105.139
IFOHAO	4.413	115.261
KUXBUC	4.416	92.956
IFOHAO	4.426	113.457
KIVCAW	4.427	127.57
WANNUV	4.428	96.167
NUHDEB	4.431	121.824
UMADOE	4.432	116.459
XAYLUH	4.433	118.232
KUSFAI	4.434	107.077
IHUMON	4.438	106.212
PERWIS	4.44	121.204
WANPOR	4.44	93.357
XAYLUH	4.44	100.595
PIQNOV	4.442	119.967
KORQIU	4.443	103.574
XIDGEY	4.45	93.177
KIVJUX	4.453	133.197
SUWFOG	4.461	123.391
FORCUM	4.463	102.522
SEVSUK	4.467	119.246
WANPAD	4.467	108.913
RETRIR	4.47	94.028
WECZUA	4.476	133.62
RUFZEA	4.479	116.859
LENWUZ	4.48	106.857
KIVBUP	4.482	130.954
WANNUV01	4.482	93.816
KIVCIE	4.483	114.051
HEWMUU	4.489	123.316
CARXUQ	4.492	97.762
MASVUZ	4.495	112.154
PETGIG	4.496	158.815
JOHFOD	4.497	100.136
NUHDIF	4.498	122.124
CARHAG	4.5	113.496
CARHAG	4.5	94.184
BOBGUV	4.501	116.85
LEBYOJ	4.503	98.698
REZQIZ	4.509	138.268
IFOGUH	4.51	113.65
YEWLEU	4.51	92.236
FABWOX	4.511	117.735
DIACET	4.513	114.319
KUSFIQ	4.513	138.694
COHPEW	4.515	155.217
YEWLEU	4.517	97.888
BISBOW	4.521	122.248
TEXTIC	4.522	111.189
MEDMIU	4.523	102.864
UYIRIF	4.524	95.421
XIDGEY	4.527	90.724
LEBZAW	4.53	115.033
BIBFUP	4.531	151.649
KIVCAW	4.534	128.6
WANNUV	4.534	91.142
GAGVAP	4.538	103.709
GAGVAP	4.538	112.791
SUWFIA	4.538	90.034
MUFDEZ	4.539	90.105
HOWXEY	4.541	127.205
ZEHTAK	4.541	111.781
WUFROH	4.543	90.762
PIQNUB	4.544	121.673
TEXTUO	4.545	114.856
GARVON	4.548	93.293
KIVBUP	4.549	122.426
VUFQUL	4.556	148.55
KUWNEX	4.56	106.966
RIFLEA	4.563	94.652
SICFIW	4.563	108.335
DIACET	4.568	114.948
FABWAJ	4.568	118.328
AXUNUE	4.569	109.478
QEXBON	4.569	100.625
SEQFOL	4.572	103.849
IMORUA	4.572	110.732
VUFQUL	4.58	95.357
GARVED	4.584	97.093
TEXTIC	4.585	112.359
IMOREK	4.586	118.419
REZQOF03	4.59	112.26
IFOGUH	4.592	94.46
BIGCIE	4.594	165.319
DUDQAW	4.599	93.238
LENXAG	4.599	107.656
GUFNEC	4.601	131.164
TEXTOI	4.604	116.058
MADWUN	4.606	122.542
GUFNIG	4.606	135.387
GUFNIG	4.608	90.037
TEXSUN	4.616	110.399
LENXEK	4.618	104.816
GARVUT	4.619	95.379
NEZWAS	4.619	95.979
NOQQES	4.619	113.612
KIVBUP	4.625	124.267
KIVBUP	4.629	92.635
CARGUZ	4.632	128.701
LAYWAM	4.637	105.36
PUJNIU	4.639	119.047
UYIRAX	4.639	104.486
MASWEK	4.642	104.275
WANNOP	4.643	112.073
PETGIG	4.644	168.557
PUJNIU	4.646	123.74
WANPAD	4.652	102.703
KIVCAW	4.656	128.241
LUNKOW	4.66	129.347
KORQIU	4.662	137.259
MUFDAV	4.669	112.494
IFOHAO	4.67	116.303
LEBZAW	4.67	126.256
IHUMUT	4.676	121.407

## Sheet: 5 membered rings
NAME	DIST1	ANG1
OJEHIW	3.162	112.798
LADWEW	3.411	170.557
LADWEW01	3.412	170.442
POBKOJ	3.437	173.009
CIBZAR	3.473	150.816
QADQIW	3.546	153.856
LADWEW	3.611	152.359
EHIQET	3.658	90.358
LADWEW01	3.685	152.328
LADWUM	3.71	153.223
LAGGIM	3.735	159.315
ZEFNIK	3.749	138.927
QOCJEA	3.759	143.33
CIBZAR	3.768	122.449
XIMSIX	3.807	136.178
XEYLIY	3.827	104.691
CIBZAR	3.835	156.389
VEBQEZ	3.837	95.082
NEHCIP	3.839	94.423
CIBZAR	3.841	127.194
LITNEJ	3.865	99.354
CIBZAR	3.876	157.703
XEFZOZ	3.879	98.963
DAFJEB	3.886	147.084
IVEXIS	3.9	95.66
CIBZAR	3.901	145.708
UYIGUH	3.917	90.78
UYIFIU	3.923	93.472
CIBZAR	3.961	118.262
ILOQAD	3.97	121.788
NIGPOI	3.973	111.847
ORANEC	3.987	93.412
WELCOI	3.989	93.132
HIGLAL	3.999	90.6
PEYBUS	4.009	164.044
EXIFAT	4.011	173.619
NIGPOI	4.011	95.485
RUSFIV	4.011	136.129
NIGPOI	4.017	114.217
JUVYAA	4.022	91.693
DINYOR	4.024	165.618
XAMBAP	4.027	95.081
XEGBUI	4.039	93.4
HUDZAJ	4.048	125.85
IDEFIJ	4.048	165.88
CIBZAR	4.053	141.025
XAMBAP	4.053	139.251
CIBZAR	4.054	104.973
CIBZAR	4.073	106.184
ISEDOA	4.078	93.63
GUDJUL	4.09	110.603
CIBZAR	4.1	146.82
JUVYAA01	4.1	163.436
CIBZAR	4.109	130.778
EHIQET	4.116	152.028
XEFZOZ	4.118	111.545
LAJYOO	4.119	95.431
CIBZAR	4.119	147.686
XEGBUI	4.12	133.292
GUDJUL	4.126	118.579
TUMSAY	4.132	113.943
ZEFNIK	4.144	143.931
EXIFAT	4.161	112.016
JUVYAA	4.162	98.109
RUSFER	4.167	111.208
NIGPOI	4.169	97.198
RUSFIV	4.178	106.746
XIMSIX	4.179	96.505
XEFZOZ	4.18	96.293
IDEFIJ	4.194	175.226
XIMSIX	4.196	134.673
VAHPAX	4.202	101.348
XIMSIX	4.213	124.29
QADQIW	4.219	110.175
CIBZAR	4.221	97.175
ISEDOA	4.235	136.593
JUVYAA01	4.244	99.82
JUVYAA	4.249	145.699
PEYBUS	4.254	131.888
PEYBUS	4.254	119.862
EHIQET	4.256	140.532
EXIFAT	4.26	122.555
XEFZOZ	4.261	125.742
JUVYAA	4.278	143.616
ISEDOA	4.279	135.589
JUVYAA	4.281	95.336
POBKOJ	4.281	151.444
UYIFIU	4.283	92.633
JUVYAA	4.29	110.861
CIBZAR	4.293	93.818
CIBZAR	4.293	130.201
ZEFNIK	4.3	167.619
QADQIW	4.302	97.003
JUVYAA01	4.306	146.751
CIBZAR	4.31	94.341
JUVYAA01	4.311	145.505
CIBZAR	4.313	109.658
RUSFAN	4.319	160.854
ISEDOA	4.321	99.396
LAJYII	4.327	102.629
XAMBAP	4.329	120.613
CIBZAR	4.33	137.883
ISEDOA	4.34	147.001
IDEFIJ	4.344	171.387
CIBZAR	4.345	120.358
NIGPOI	4.345	94.705
QADQIW	4.345	91.127
QOCJEA	4.345	163.604
CIBZAR	4.351	107.355
CIBZAR	4.353	147.05
JUVYAA01	4.358	97.479
NIGPOI	4.37	109.691
UREJOS	4.379	160.374
LADWEW	4.401	91.377
CIBZAR	4.401	136.546
JUVYAA01	4.406	110.688
CIBZAR	4.417	175.744
LADWUM	4.428	96.614
WELCOI	4.428	127.432
LADWEW01	4.434	91.498
LADWEW	4.446	91.45
XEFZOZ	4.454	115.421
IDIXOK	4.455	141.968
QADQIW	4.462	158.427
EHIQET	4.473	116.646
BPCAMN	4.481	114.815
LADWEW01	4.483	91.817
CIBZAR	4.49	107.442
DEQKOC	4.49	170.351
LADWEW	4.499	132.615
CIBZAR	4.499	122.132
POBLAW	4.515	132.538
NIGPOI	4.521	102.427
CIBZAR	4.522	97.129
FUDQEC	4.525	145.857
LAGGIM	4.525	159.758
CIBZAR	4.533	145.861
CIBZAR	4.536	95.374
XAMBAP	4.537	138.994
QOCJEA	4.538	149.201
LADWEW01	4.54	132.634
XEGBUI	4.544	136.4
XAMBAP	4.548	103.251
PEYCIH	4.551	106.464
CIBZAR	4.555	119.532
TAMTUY	4.565	105.025
WIZMEA	4.596	119.17
PEYCIH	4.599	123.487
TAMTUY	4.622	126.805
CIBZAR	4.623	94.393
OJEHIW	4.623	104.577
WIZMEA	4.625	117.762
IVEYEP	4.628	128.183
BAQCOO	4.631	152.104
JUVYAA	4.632	110.422
NIGPOI	4.636	110.138
FUDQEC	4.637	131.862
EXIFAT	4.641	167.385
CIBZAR	4.642	92.381
JUVYAA01	4.647	110.053
TUMSAY	4.649	118.627
XEFZOZ	4.653	93.814
CIBZAR	4.654	95.961
LADWUM	4.659	144.178
UCITIM	4.663	115.496
RUSFIV	4.665	110.735
JUVYAA	4.671	153.753
CIBZAR	4.672	103.57
NEHCIP	4.68	160.708
ZEFNIK	4.68	112.862

## Sheet: 6 membered rings
NAME	DIST1	ANG1
AXOHAZ	3.256	165.812
TENRAI	3.268	168.615
JUVYAA	3.295	176.866
AXOGUS	3.302	166.855
OJEHIW	3.312	107.426
KOLGUO	3.358	164.892
HUHXIU	3.361	153.729
MUMFUX	3.361	163.027
CITSOP07	3.369	153.246
NAHTOI	3.369	179.613
OSOSUL	3.37	161.862
HUXHEQ	3.373	165.134
JUVYAA01	3.379	178.363
AXOGUS	3.385	168.359
IOBNIT19	3.391	104.052
UJICEY	3.393	156.883
ZUQMIJ	3.4	174.144
CEYXAI	3.401	163.923
QEVWIA	3.401	170.797
PIPQUA	3.406	158.902
QEVWIA	3.406	163.876
CITSOP06	3.407	153.981
UXOTIN	3.408	159.533
AVULIO	3.421	163.295
LIPCEU	3.424	166.354
FEJLOW	3.428	160.238
HONBIY	3.435	178.02
POBKOJ	3.437	173.009
SIYXEG	3.438	171.412
EWOXIZ	3.439	163.883
OLEMAV	3.439	152.749
CITSOP05	3.446	155.674
HUHXUG	3.447	169.163
TEGFUI	3.448	150.668
IPUSIX	3.45	153.02
KUQSAS	3.454	173.947
ZEFNIK	3.454	161.934
SEDBIP02	3.455	167.88
ZUQMIJ	3.455	168.641
QEVWEW	3.457	166.771
QEVWIA	3.459	169.078
NIQZET01	3.461	164.735
GIKHAM	3.463	162.618
UJIGAY	3.464	157.517
JUWNAS	3.465	167.239
FEJLOW	3.466	161.477
CERRUP	3.467	129.856
MOCGET	3.467	159.409
XETRUM	3.467	150.165
DIVSIN	3.47	165.102
CIBZAR	3.473	150.816
OSELOQ	3.473	159.643
NICTAW	3.474	163.741
LAKGAG	3.479	152.095
MUGJEG	3.48	166.032
XAKGIA	3.48	152.202
ZUQMOP	3.48	167.484
OTAMEE	3.48	171.412
LOPHOQ	3.481	174.132
DOZLOV	3.482	150.396
JUDGIB	3.482	170.154
RELXOY	3.483	107.882
OSEMAD	3.484	157.316
KUKTIV	3.485	165.555
NAPRIG	3.486	141.013
IOBNIT18	3.489	103.44
NICTAW01	3.492	158.984
HESCEO	3.493	172.186
IOBNIT18	3.493	106.14
WARLUY	3.494	153.579
YOZLUW	3.498	166.937
LAJYII	3.5	152.922
CITSOP04	3.5	157.317
TAGKOD	3.502	173.114
OLEMAV	3.504	169.537
NENCAL	3.506	142.66
NICTAW	3.506	169.734
PICCOV	3.507	171.121
MERDAO	3.51	128.633
PEKBAL	3.512	164.314
DAHVAM	3.513	167.607
PIZCAE	3.513	164.099
RUKFUA	3.514	151.915
UBUPOZ	3.515	157.069
ZACTOM	3.517	150.121
SATJOM	3.518	159.994
DOQYUD	3.52	150.57
PIPQUA	3.52	154.455
ISEBEP	3.526	135.34
WIFVAJ	3.526	168.446
YEHXIV	3.526	163.478
BIPSAX	3.527	162.402
BANWIX	3.529	152.76
JEHZUU	3.53	154.365
PUDKEH	3.53	146.993
XIMSIX	3.531	158.435
USIBOQ	3.533	153.797
NUSDOX	3.534	151.243
KEDDUS	3.537	114.772
WOJMEN	3.538	152.574
CITSOP03	3.54	158.352
FELMUF	3.541	156.926
JUVYAA	3.541	152.916
TAGKOD	3.541	151.622
LACSIU	3.542	167.27
WELWIV	3.543	150.732
ZULPUT	3.543	166.857
OSELIK	3.543	154.46
JEGLAL	3.544	167.093
NIDDIQ	3.544	148.203
TURROP	3.544	168.799
ZOGVUO	3.544	92.564
IOBNIT19	3.545	106.176
TUKFUB	3.545	153.499
QADQIW	3.546	153.856
MOFFUI	3.547	163.15
JADBIZ	3.548	168.192
FEKRUK	3.549	146.875
MINVAH	3.551	167.928
WARLOS	3.552	151.679
ZIKYOH	3.553	153.329
WUFXED	3.554	137.821
GEMZIK	3.555	156.751
AXOHIH	3.555	176.658
DEYSEI	3.556	160.208
VELTOY	3.557	170.967
QUYNII	3.559	166.585
ECEZUJ	3.56	155.89
ILANER	3.56	173.449
UWUYAP	3.561	171.017
FAZXEM	3.564	161.728
JINCAK	3.564	90.8
ZULPON	3.564	150.927
FAVYAF	3.565	171.817
GURRET	3.565	145.828
AXOHIH	3.565	155.047
DANYEY	3.566	157.239
NAWROT	3.566	146.716
WARKAD	3.566	178.947
MINVAH	3.568	167.511
QOGBAR	3.569	162.421
GOZJOX	3.571	169.901
NUWMEA	3.571	90.044
MEBCOL	3.574	151.276
VAZMIV	3.575	140.256
LIKLAT	3.576	171.443
VELTOY	3.576	173.533
TAWBAW	3.577	172.65
ULEFUN	3.577	164.82
NAWNOR	3.578	149.5
BUYYUR	3.58	137.48
XEQHAF	3.582	98.592
YACXIM	3.583	157.635
GEZGEZ	3.585	139.988
PUFHOP01	3.585	96.954
JEGLAL	3.586	147.328
KUVHOZ	3.586	145.524
JETJOK	3.587	153.507
NORRIY	3.588	141.166
PUFHOP	3.589	97.079
NENQUV	3.59	158.138
ARAHEH	3.591	129.368
GEZGEZ	3.591	129.074
BOPSUX	3.592	152.302
OVODUA	3.592	90.955
CITSOP06	3.593	90.57
TAGKOD	3.594	146.969
TIZWEF	3.594	158.713
SEDBIP03	3.595	166.854
XEJQOV	3.595	151.365
QEXBON	3.596	159.521
GEDGAA	3.598	171.487
UFAWOP	3.599	120.167
HUHXUG	3.6	146.213
OGOYEP	3.6	164.311
MERCAO	3.602	156.181
BOLWAA	3.603	167.133
KOFDAM	3.603	171.328
ESUROC	3.603	130.485
ONIZOB	3.605	161.609
QIYZOP	3.605	164.368
ZEMKOR	3.605	144.57
FILZIM	3.607	168.125
JUVYAA01	3.608	155.285
KEDDUS01	3.608	151.952
YANPAH	3.609	90.032
ASAZOM	3.609	137.766
XOBJEF	3.61	166.401
QQQETG03	3.612	153.314
IBILEN	3.612	161.257
IWIKII	3.613	135.669
OSELOQ	3.613	159.299
DEXZEN	3.614	166.768
OJIHAS	3.614	161.902
XUVLIM	3.614	157.902
TAWFAB	3.619	158.943
CABGAR	3.62	150.546
KEMROK	3.62	116.296
ONALAT	3.62	137.879
AXOHAZ	3.62	146.151
HOWXEY	3.621	92.387
ZAGVOV	3.621	166.777
AVADUY	3.622	148.775
CEWCIT	3.622	168.181
EMUZES	3.622	149.262
HEBTAM	3.622	144.9
BUZLEQ	3.623	94.221
YASQIU02	3.623	134.888
YASQIU01	3.624	134.218
BAXYEF	3.627	138.281
OSEMAD	3.628	153.984
EDUGES	3.629	104.262
TENPUA	3.629	170.501
TIQFAC	3.629	162.309
ISEDAO	3.629	164.874
OSELEG	3.629	158.696
IXUYIL	3.63	161.205
UJISIR	3.63	91.196
ABIYOC	3.631	142.464
HOMSOU	3.631	147.845
PUKDOR	3.631	161.976
QIFHET	3.631	173.579
BIRCIR	3.632	168.496
GOYMAL	3.632	142.545
MEFIBZ10	3.632	159.673
SOKLIQ	3.632	164.906
YASQIU03	3.632	135.701
BOKJIX	3.635	173.454
FESPAW	3.635	99.146
MAGXEA	3.635	158.196
QEXBON	3.636	158.585
RUWPUX	3.637	141.674
IHOJIA	3.637	170.138
WUKLAR	3.637	151.279
YASQIU04	3.637	136.435
LOTMOZ	3.638	164.18
RALDOY	3.638	147.477
EFUFOC	3.639	103.661
EHESEQ	3.639	171.911
AXOHIH	3.64	173.778
ABIYUI	3.641	141.662
LUPWUQ	3.641	170.14
KUHWUI	3.642	151.878
POBKOJ	3.642	160.925
POBLAW	3.642	151.542
XUQZER	3.642	102.903
BIBFUP	3.643	154.218
KUKTIV	3.643	174.221
SUWKED	3.643	152.141
CONRUU	3.644	156.766
XORYUY	3.644	91.067
YOLHEO	3.644	148.93
EYOCUT	3.644	158.907
DEDKEF	3.646	99.428
YASQIU	3.646	140.159
YASQIU05	3.646	137.28
UDEWOR	3.647	159.567
WIFVAJ	3.647	158.058
UYUZAS	3.647	166.955
FICZOJ	3.648	141.53
OVOCOS	3.648	169.894
POPKAI	3.648	164.258
OSELUW	3.648	154.448
NICSOJ	3.649	163.406
QOHMAD	3.649	135.193
ADOLIP	3.65	90.907
FAKCON	3.651	141.513
AJEYEU	3.651	154.512
CIYRAF	3.651	143.396
UXASUK	3.651	90.29
XEQHAF	3.652	94.741
QEGYEG	3.653	164.395
UKETAH	3.653	146.869
DEVREE	3.654	141.48
GEZGEZ	3.656	90.524
QEVWIA	3.656	93.325
ZUQMOP	3.656	166.742
AXAPIZ	3.657	91.915
PUFKOS	3.657	140.892
NIZHEM	3.659	158.802
SAJPIF	3.659	149.561
LUNDIH	3.661	145.905
YOYLAA	3.661	154.467
NUWMEA01	3.662	91.049
KAXSAE	3.662	149.027
RORPEV	3.662	144.606
UXASUK	3.662	91.664
CITSOP	3.663	160.627
MAGHIO	3.663	168.108
FOWWEW	3.666	124.469
OGOXOY	3.666	166.464
OPAYOU	3.666	93.241
VIXQUQ	3.666	160.238
OSABUG	3.667	147.058
QQQETG02	3.667	157.727
TIKREM	3.667	145.092
IMECUB	3.667	149.995
BISBOW	3.668	153.432
YIWGET	3.668	158.619
EJULAZ	3.67	160.849
NAQTUX	3.67	137.223
QQQETG01	3.67	154.912
XUQZER	3.67	97.439
ZEFNIK	3.67	157.107
NIGPOI	3.671	103.37
AXOGUS	3.671	147.401
CERROJ	3.672	101.749
CITSOP02	3.674	159.965
YAKLII	3.674	163.411
CAMSUF	3.675	128.807
HOCPEV	3.675	164.179
SILBAS	3.675	147.448
JABLAC	3.677	174.821
PEYBUS	3.677	149.227
ANUPOP	3.678	134.141
BEHHUS	3.678	150.726
BOLNOG	3.678	93.205
DIXXEO	3.68	149.83
EPIGAM	3.68	145.167
PUDREO	3.68	131.637
AXOHAZ	3.681	149.424
UXAQOC	3.681	90.764
OJIXOX	3.682	102.94
NEHCIP	3.682	161.54
SOKWOH	3.682	176.693
VOJBAY	3.682	162.36
EWOXUL	3.683	102.592
QARFAS	3.683	93.766
CIBZAR	3.684	160.796
CITSOP05	3.685	91.42
OPOXIB	3.685	147.026
TUFCIH	3.685	92.832
VEXYAB	3.685	132.923
CUPMIM	3.686	109.777
COPYEO	3.687	101.785
GITXOY	3.687	155.737
GUHVUC	3.687	145.434
KAYMAB	3.687	158.387
ZEHTAK	3.687	161.163
BULWEN	3.688	140.574
UCEPEY	3.689	93.611
MUSNIZ	3.69	139.499
OJIJIC	3.691	156.535
IJEJAL	3.692	169.117
IJEJAL	3.692	93.067
HOSHEF	3.692	99.795
KEMVIK	3.692	157.926
POKBAV	3.692	147.587
WEWJEQ	3.692	144.523
OZAZIB	3.692	101.809
GEZGEZ	3.694	106.477
MABGIJ	3.695	124.939
COWQOX01	3.695	96.282
VIKHOP	3.695	155.478
NINPIM	3.696	90.342
REBBEG	3.696	92.443
REWFUV	3.696	144.368
TAGKOD	3.696	150.966
TOBCAQ	3.696	94.174
MUGVIW	3.697	93.396
LITNEJ	3.698	165.296
UROKIX	3.698	100.672
WIGLIK	3.698	173.322
WOJQAQ	3.698	90.635
LADVEV	3.699	96.952
JEJBUY	3.699	155.647
ROFVEQ	3.699	90.329
YASQOA	3.699	153.145
IWARII	3.7	165.705
TENRAI	3.7	162.838
WEZCEM	3.7	105.008
ATAGAG	3.7	94.319
TEXVEX	3.701	162.979
UXARUJ	3.701	94.633
FAGSOY	3.702	117.13
LENXEK	3.702	168.934
YAYDAF	3.702	99.258
OLOHUV	3.702	92.129
CEQLIW	3.703	91.479
IPUDEE	3.703	161.182
TARMEH	3.703	109.302
UDIJAV	3.703	136.373
BOLNEW	3.704	93.245
KOWDIM	3.704	163.514
IFOJIY	3.705	165.059
MIYKOU01	3.705	93.787
TIMDUQ	3.705	177.082
YIRFAJ	3.705	91.343
AYUJAG	3.706	141.874
EXIFEX	3.706	91.843
FAGSOY	3.706	139.962
LOPJIL	3.706	121.057
UXARUJ	3.706	94.923
RAFXND	3.707	139.042
ANUPIJ	3.708	94
BOLNAS	3.708	97.634
GODCEI	3.708	144.493
JOPXOD	3.708	168.69
SOKQUH	3.708	145
BISBEM	3.709	162.497
OQITOZ	3.709	94.024
UXASAQ	3.709	90.308
HUHXUG	3.71	160.402
CIBZAR	3.711	159.663
DUNJEC	3.711	136.517
HUHXOA	3.711	90.215
RUWQAE	3.712	115.785
CEQLIW	3.712	94.891
ESAXUT	3.712	138.693
KAXSAE	3.712	150.507
MAGBEC	3.712	91.168
UWUYUJ	3.712	106.03
ABEKAW	3.713	100.814
NEVMOR	3.713	90.837
OJIJEY	3.713	161.372
ADUDAE	3.714	140.884
ANUPOP	3.714	159.681
BUNGUO	3.714	97.91
NIFHAM	3.714	149.232
ITEZAL	3.714	126.894
UZUMEK	3.714	100.433
BOLNOG01	3.715	97.498
MUTRIC	3.715	99.401
SILBAS	3.715	91.989
SUWKAZ	3.715	157.175
SUGGAE	3.716	141.469
YISHIT	3.716	162.119
ATAHEL	3.716	96.789
ABAPEB	3.717	160.965
IPOXOD	3.717	160.48
UTUREJ	3.717	101.078
IJEJAL	3.719	172.563
FICZOJ	3.719	119.579
NAWFEX	3.719	105.948
NOCXOV	3.719	135.2
BULZAM	3.721	146.835
CITSOP01	3.721	160.391
ABEMEC	3.722	133.187
BOLNIA	3.722	95.283
GESRON	3.722	103.877
IPUDEE	3.722	159.909
WIGSOX	3.722	148.609
AVEKAQ	3.722	102.072
ITEYAK	3.722	94.47
EFUFOC	3.723	102.38
FICZOJ	3.723	153.116
UREHOQ	3.723	103.738
UVECEF	3.723	163.929
UWUSAJ	3.723	93.837
WUHSUQ	3.724	146.397
OGOXOY	3.725	147.755
HUMFUT	3.726	163.645
IRUHOT	3.726	110.395
ISEBUF	3.726	115.236
NINMEF	3.726	91.87
JETJOK	3.727	126.253
REMNUV	3.727	97.535
VELWIU	3.727	150.623
COFFIO	3.728	140.701
FUDQEC	3.728	160.989
ITEYOY	3.728	126.343
IPUDEE	3.729	159.307
BUYYIF	3.73	128.532
NEZWEW	3.73	96.956
QUFLIP	3.73	175.089
WEWJEQ	3.73	142.412
YUHLAP	3.73	168.519
ZUSXOC	3.73	162.507
AXOHAZ	3.73	149.26
IWAREE	3.731	133.795
JOXQUK	3.731	155.77
MOVCIM	3.731	161.056
OJEHIW	3.731	134.912
ILANER	3.731	142.227
OZEBUT	3.731	90.306
FOQZAP	3.732	159.173
LAYWAM	3.732	128.512
MOVHIR	3.732	144.922
IMOREK	3.732	91.878
JONQUA	3.733	132.505
KAPFUF	3.733	148.909
MIQFEX	3.733	96.824
NUDVIU	3.733	144.984
XUXLOU	3.733	122.673
BANWIX01	3.734	150.163
MUMGAE	3.734	135.536
POJWIX	3.734	132.745
POJWIX	3.734	111.629
TITHYN10	3.734	98.062
CAYLAQ	3.735	171.634
KECXOH	3.735	95.814
NICTAW01	3.735	156.434
VERHUW	3.735	97.919
WOHXAT	3.735	149.05
CURHUT	3.736	159.73
GUJTUD	3.736	94.284
NIQZET	3.736	170.302
OJIKEZ	3.736	164.137
PERLEG	3.736	91.937
QQQETG02	3.736	163.529
RUDHOQ	3.736	139.462
RUDHOQ	3.736	139.64
VULLEV	3.736	139.966
QQQETG03	3.737	160.3
CUZDOR	3.737	168.028
JUZRED	3.737	90.296
REZQOF03	3.737	97.407
VIGLEF	3.737	93.783
YAKLII	3.737	159.609
RUWQAE	3.738	136.385
NINPIM	3.738	90.238
OGAGAG	3.738	170.12
OJIGUL	3.738	92.862
UXAQUI	3.738	95.901
CEQLIW	3.739	95.332
NITSER	3.739	105.118
NITSER	3.739	100.686
OJIJEY	3.739	159.529
OZEFAD	3.739	157.6
IVEXIS	3.74	151.342
KIDSEY	3.74	160.108
YUHLAP	3.74	168.652
DIZQIO	3.741	132.808
POKXAP	3.741	155.969
HUQSES	3.742	92.971
JETJOK	3.742	125.114
QANFES	3.742	177.326
SAJDAL	3.742	139.373
WECRII	3.742	131.227
ITEZAL	3.742	129.438
UKURUQ	3.743	121.552
BOYHIJ	3.743	161.399
CUJGAR	3.743	141.191
IBZFRO02	3.743	106.093
OCIFIQ	3.743	94.55
AQECIL	3.743	155.754
MAFMAL	3.744	91.866
CEQKOB	3.744	98.415
EZURAU	3.744	101.868
PUSVEH	3.744	133.515
IXUYEH	3.746	164.499
ODIPUP	3.746	98.865
OJIJIC	3.746	95.374
QABXIA	3.746	125.87
QEVWIA	3.746	157.695
CARHOU	3.747	105.144
VAZMUH	3.747	151.863
WIFVAJ	3.747	171.017
XEGBUI	3.747	98.253
YUHLAP	3.747	169.465
ADOYEX	3.748	149.734
DIPMOB10	3.748	150.075
IOTHYP	3.748	96.852
SIXPEW	3.748	95.653
FAWVIK	3.749	159.91
LANGAK	3.749	144.944
NALGOZ	3.749	93.895
BOLNUM	3.75	98.646
DINMIZ	3.75	118.791
IPAZEP	3.75	172.067
ONUMOB	3.75	164.927
PIXZAZ	3.75	95.335
QABYIB	3.75	153.822
RORQAS	3.75	168.67
TECWUT	3.75	172.536
CEPMUI	3.751	166.064
EWOXUL	3.751	101.65
IHXNAQ02	3.751	104.077
TUJSID	3.751	153.68
ABEKAW	3.752	101.637
CUJGAR	3.752	141.733
EDAGUL	3.752	95.409
ETOKAZ	3.752	173.768
KEQMAW	3.752	162.038
YIRFAJ	3.752	154.121
ZULPUT	3.752	159.552
IWUGIT	3.752	99.113
EZAYEJ	3.753	93.247
KECPIU	3.753	171.265
ZEBJUN	3.753	136.325
OZEFAD	3.753	164.979
REZQOF02	3.754	90.801
RUSFIV	3.754	151.888
UNUHAN01	3.754	154.987
WOJQAQ	3.754	90.25
LEPPEC	3.755	98.957
TAWFAB	3.755	99.344
TITZUS	3.755	161.759
VOMHAH	3.755	135.975
WAMBIY	3.755	158.207
XECPUT	3.755	97.781
YANNUZ	3.755	97.482
YUHLAP	3.755	168.153
ZECLUQ	3.755	167.367
COJGIT	3.756	161.686
DISZAJ	3.756	103.406
MOCGET	3.756	149.045
BOXNUZ	3.757	124.594
EFUFOC	3.757	97.21
PIPQUA	3.757	146.673
XAKLUT	3.757	160.97
XIPVIE	3.757	141.826
ZEBJUN	3.757	116.636
KOLHAV	3.758	153.875
NEGZEH	3.758	163.291
ESAMUJ	3.758	161.211
ATAFUZ	3.758	99.087
IGUXOA	3.759	129.986
MOCFOC	3.759	154.209
QOCJEA	3.759	143.33
VEPNAI	3.759	146.989
YUXKUY	3.759	142.682
AJEYEU	3.76	150.864
ITUREV	3.76	98.367
JIBHEK	3.76	115.563
JIBHEK	3.76	161.221
OJIKAV	3.76	153.464
POJWIX	3.76	133.099
POJWIX	3.76	120.562
TIVMIV	3.76	172.497
VELBOF	3.76	142.853
TUGLEN	3.761	160.043
GALBIH	3.762	142.092
MADVUM	3.763	140.669
MADVUM	3.763	140.628
INPHAC	3.763	98.735
QODQEI	3.763	93.873
ARIPEZ	3.763	107.435
BISBEM	3.764	144.555
CITSOP04	3.764	92.634
DOJPIE	3.764	106.597
DOJPIE	3.764	120.598
HUYLOF	3.764	99.602
KECPOA	3.764	165.34
PADHUY	3.764	105.757
QUJSOF	3.764	151.515
ZEKVIW	3.764	134.196
MADVUM	3.765	126.361
EFOSOK	3.765	95.192
NIFZUA	3.765	175.354
XOHWOH	3.765	161.588
DURZEX	3.766	166.253
IBILOX	3.766	90.797
ITUMUG	3.766	135.87
MEKGIS	3.766	140.835
SOTKAQ	3.766	100.312
ATAHEL	3.767	94.418
UWUYAP	3.767	154.178
HUDZAJ	3.768	153.543
HUHXOA	3.768	101.638
FANYOJ	3.769	166.978
MIPTOV	3.769	162.707
OPEXUD	3.769	102.96
LOWMOC	3.77	99.862
TEVFEG	3.77	95.768
TOSCAI	3.77	136.197
XOHWOH	3.77	162.402
YIRFAJ	3.77	154.622
QEWZUQ	3.771	136.655
ACEPOO	3.772	92.752
BACCUF	3.772	102.408
PIJGEX	3.772	99.144
SAYKUZ	3.772	156.008
TIHXNO10	3.772	149.196
UXASOE	3.772	91.012
FARNOD	3.773	90.892
FUYYUW	3.773	151.154
GOYTIA	3.773	140.958
JIBHEK	3.773	159.147
SATJOM	3.773	91.439
UTEPAM	3.773	105.676
XEVREY	3.773	145.22
YIRCEK	3.773	121.526
FUPFEE	3.774	97.088
GUFNOM	3.774	152.679
PUWXEM	3.774	99.846
QOCSUZ	3.774	152.686
SOKQUH	3.774	135.232
XUFPIA	3.774	110.553
LACSIU	3.775	106.046
PAXSIS	3.775	139.25
YASTET	3.775	141.645
ZUVJAD	3.775	161.576
BUZLIU	3.776	94.665
MABGUV	3.776	93.496
OCOQIG	3.776	152.291
QUDPIP	3.776	158.236
XUGRAV	3.776	129.011
CANGUU	3.777	101.21
IOBZAM	3.777	93.536
ARIVUV	3.777	90.506
OZEDOP	3.777	94.055
KAPFOZ	3.778	166.625
OJIKID	3.778	163.91
ZAFJAV	3.779	101.223
IHOJIA	3.78	117.076
UYABII	3.78	117.193
FUMZES	3.781	90.747
GEGYEX	3.781	92.682
QADQIW	3.781	131.504
YIWGET	3.781	97.866
APEZON	3.781	90.703
ITEZEP	3.781	128.092
ASAPOB	3.782	168.129
HUXGIT	3.782	152.704
LILMEA	3.782	91.378
NIPQAH	3.782	130.22
QACBAZ	3.782	103.485
SEDBIP03	3.782	158.165
WEWWOK01	3.782	109.547
XIJYAT	3.782	98.606
XILMEN	3.782	130.432
YAJVEN	3.782	160.842
ONALAT	3.782	143.426
AFOXEA	3.783	149.14
BELDUU	3.783	140.998
FUBMIB	3.783	118.804
GOZJEN	3.783	159.246
HUXHEQ	3.783	137.462
URIFIL	3.783	152.121
WOHWOG	3.783	138.753
ALEPOZ	3.783	150.101
KECNOX	3.784	152.927
PURDUD	3.784	96.642
RUQFER	3.784	98.596
AHOREV	3.785	91.275
BOLNAS01	3.785	100.068
GESQEC	3.785	92.344
KADBIC	3.785	155.572
LEDBIG	3.785	132.198
NEZWAS	3.785	95.22
UCASID	3.785	98.148
UYOVIO	3.785	143.054
YOTZOX	3.785	92.965
IWUGIT	3.785	149.807
JAJZID	3.786	151.776
KEDDUS	3.786	143.047
TONWUQ	3.786	127.546
UKAGIX	3.786	94.541
KIDSEY	3.787	94.66
OJIHIA	3.787	105.92
VIXWOR	3.787	93.885
XOHWIB	3.787	160.74
AXOGUS	3.787	149.288
ANUPOP	3.788	138.123
EFUDOA	3.788	93.425
JUQPIX	3.788	90.19
KUSFEM	3.788	99.418
LEPNIE	3.788	91.339
ASIJOE	3.788	154.747
ASITII	3.788	106.409
CEQKUH	3.789	97.866
COSYIU	3.789	134.57
NEPDES	3.789	159.296
PUZHAW	3.789	106.192
RELXEO	3.789	107.987
AJOGUE	3.79	104.834
CEDGEA	3.79	144.371
GAJRER	3.79	157.087
JOMPOT	3.79	148.368
JOYXAY	3.79	165.059
LITBIA	3.79	166.631
IQIDUI	3.791	130.99
SOKXIC	3.791	132.837
XIJYAT	3.791	99.577
IPOFOJ	3.792	139.665
NOCRUS	3.792	172.056
PEYBUS	3.792	104.932
PUFLIN	3.792	117.842
QOGBOF	3.792	92.091
XEGBUI	3.792	119.271
GUFNIG	3.793	148.924
LAWVAJ	3.793	104.553
LOGLOJ	3.793	167.991
CADQUW	3.794	137.155
DUNMUX	3.794	96.62
IBABAP	3.794	139.539
SESWOD	3.794	129.311
SOPVUQ	3.794	116.339
UCEPEY01	3.794	104.128
AHEVOZ	3.795	100.734
MUWJUL	3.795	124.352
ROFVEQ	3.795	149.562
WOYVAH	3.795	90.179
ZEPROE	3.795	96.714
DADBUF	3.796	90.467
DIVCOB	3.796	102
TAPROT	3.796	166.082
USOGIU	3.796	136.886
VAYGOU	3.796	94.461
UREDIH	3.796	129.745
GOYVAU	3.797	160.78
IDAWOC	3.797	168.691
KEDDUS	3.797	101.882
OLELOI	3.797	93.69
QQQBNJ01	3.797	153.455
RESRAI	3.797	159.063
RIPCIE	3.797	125.169
TOJXEX	3.797	133.63
ZELCOL	3.797	99.907
AXOJOP	3.797	143.748
HINWEJ	3.798	147.487
OJIHIA	3.798	162.94
TUXRIP	3.798	129.424
YANNIN	3.798	140.166
ISEBUF	3.799	96.146
KIGWIJ	3.799	127.913
NIXVAS	3.8	156.662
TUMSAY	3.8	93.546
ECUVUW	3.801	157.152
IGALOS	3.801	94.055
POKXET	3.801	158.233
VUPGUK	3.801	162.745
XIZSAC	3.801	91.288
ZACTUS	3.801	130.868
ABEMEC	3.802	125.921
ANUPOP	3.802	146.359
RAVTIR	3.802	118.471
XOHWIB	3.802	163.934
UWUHOM	3.802	96.932
OLELOI	3.803	91.539
RERWOD	3.803	161.556
REZQOF02	3.803	96.393
UYOPOO	3.803	139.964
WOHZOK	3.803	109.283
GAZXUC	3.804	143.178
GUFFOF	3.804	147.89
JUZRED	3.804	135.565
TUHTUO	3.804	139.979
UGOLEK	3.804	154.685
HUXGIT	3.805	93.983
LACSOA	3.805	107.4
QAKMIA	3.805	155.936
UYOVOU	3.805	142.307
ZZZAVM01	3.805	105.297
BESSIC	3.806	132.269
JIBHAG	3.806	97.747
LICHUB	3.806	93.805
WEPCUP	3.806	169.354
ZIBXAL	3.806	143.845
TALPIJ	3.807	99.594
WIGVEQ	3.807	104.487
XIMSIX	3.807	136.178
RUWPUX	3.808	94.623
EVEFOC	3.808	132.287
FEXCUH	3.808	108.601
QODQEI	3.808	161.723
EJEDAB	3.809	105.953
AVADIM	3.809	99.177
BOZDEA	3.809	135.657
BUKVEL	3.809	92.585
MURQIB	3.809	161.09
RIZGAK	3.809	163.816
TIBENQ	3.809	99.276
XUDXAV	3.809	143.331
CARJAI01	3.81	104.93
RELXOY	3.81	106.243
UYABII	3.81	122.046
UKULOE	3.811	173.159
DADQAE	3.811	144.618
DINHIU	3.811	93.876
KUZFAN	3.811	145.822
QADQIW	3.811	94.533
QOLWAP	3.811	132.583
SEDBIP02	3.811	157.137
VEDYUA	3.811	173.079
OYIMUH	3.811	152.842
AXOKOO	3.812	135.761
BEDVEO	3.812	96.52
HEWMUU	3.812	140.757
JUZRIH	3.812	142.58
NUXQUV	3.812	152.038
PEFNUL	3.812	138.382
VEPNAI	3.812	129.527
FIMDEN	3.813	90.515
ULEFUN	3.813	161.97
WAMBOE	3.813	160.114
AVAKIR	3.814	159.175
CAZYIM	3.814	139.64
COFFIO	3.814	96.193
MEKGIS	3.814	128.528
NIXVAS	3.814	159.478
OCIPIA	3.814	94.373
OYAZOF	3.814	106.274
PUGPOX	3.814	127.674
ZUDBIL	3.814	144.943
GARJUG	3.815	112.079
KIDSEY	3.815	155.312
VAZNAO	3.815	168.447
UKURUQ	3.816	108.182
AGALEB	3.816	134.855
IDOHEO	3.816	140.16
ISASAZ	3.816	126.076
GEZGEZ	3.817	156.789
IBNZAM01	3.817	95.085
NOTZIF	3.817	146.481
SEDGOA01	3.817	126.513
ZEPFEF	3.817	155.217
UKUKUJ	3.818	152.914
BIPSAX	3.818	168.882
MUVYUA	3.818	115.047
TIMSOA	3.818	95.391
TUJSID	3.818	155.265
XUXFON	3.818	107.43
YAYDUZ	3.818	159.789
AHUWAE	3.819	94.573
COWQOX02	3.819	105.702
ELIQEX	3.819	94.466
GUMLUX	3.819	93.596
MEZHII	3.819	99.077
MIQFEX	3.819	98.958
QAJTOM	3.819	120.351
QIKXIT	3.819	145.987
UPIZAX	3.819	105.64
IJEJAL	3.82	113.18
DONFIV	3.82	140.921
FARNOD	3.82	170.431
ISUBUT	3.82	126.508
KUWQOK	3.82	134.782
LIKLAT	3.82	94.995
OLELUO	3.82	132.414
RIBHOZ	3.82	103.378
SANZUC	3.82	157.522
VAZLOA	3.82	93.57
YAFKOI01	3.82	91.745
CARJAI	3.821	105.281
KAZDEX	3.821	168.331
SOPVUQ	3.821	145.772
VOMHIP	3.821	161.083
WAMBIY	3.821	101.095
CEQKUH	3.822	100.338
KIYGUV	3.822	109.587
LEGQAS	3.822	116.711
MIQFIB	3.822	93.999
QARDOE	3.822	103.416
WELDEZ	3.822	139.915
WELDEZ	3.822	127.043
UYABAA	3.822	109.54
EFUGAP	3.823	91.909
HEQKUK	3.823	120.509
IDEPEM	3.823	147.295
IPOSIP	3.823	92.73
LEGQEW01	3.823	118.504
ROXKOH	3.823	96.176
UTIFEJ	3.823	157.174
WELDEZ	3.823	107.019
WELDEZ	3.823	121.775
YIZZEP	3.823	162.366
COWSIT	3.824	105.937
KUBYEO	3.824	96.714
SARFAT	3.824	167.491
ZZZSLE01	3.824	170.303
AJEJUV	3.825	109.67
ANUPUV	3.825	143.884
COWQOX03	3.825	106.126
GODMIY	3.825	90.011
HACMEG	3.825	136.422
TUDHEI	3.825	163.043
AVAJIQ	3.826	103.166
IBBIOX01	3.826	94.85
QEBPEU	3.826	133.943
VOMHIP	3.826	161.502
CIBZAR	3.827	128.329
COCQER	3.827	100.761
GARWAA	3.827	106.313
PABWAT	3.827	102.647
QUSSUT	3.827	177.659
WEWJEQ	3.827	95.151
WEWJEQ	3.827	96.998
XATKEL	3.827	94.065
IJECUY	3.828	170.104
BIDLAD	3.828	153.201
BIHKAG	3.828	103.96
EBUHEO	3.828	96.581
MUVZAH	3.828	105.652
POBKOJ	3.828	157.614
RINQAJ	3.828	103.951
XECPIH	3.828	92.1
XETVOK	3.828	164.448
ZEBKAU	3.828	100.882
ECUWAD	3.829	104.69
GUMLUX	3.829	148.738
HUYLOF	3.829	104.465
KUQYUT	3.829	110.396
LOWBEG	3.829	129.629
QODQEI	3.829	162.086
UHUFUB	3.829	169.252
CORNED	3.83	108.034
DUBPOH	3.83	133.842
EROQEJ	3.83	157.048
IFITEW	3.83	149.978
ORIMOT	3.83	104.611
OXIBZN10	3.83	95.194
QAGKAN	3.83	172.136
QODSIL	3.83	91.261
RUSCUG	3.83	144.389
YEJLII05	3.83	132.453
COPYEO	3.831	103.249
GAPVAU	3.831	93.673
HUYLOF	3.831	97.475
INAJEN	3.831	141.588
NAPREC	3.831	164.989
NORQET	3.831	140.857
SIJSUA	3.831	137.019
EZOZID01	3.832	100.33
NIKRAD	3.832	157.425
OBONAX	3.832	96.145
REZQOF03	3.832	157.76
TIXSOL	3.832	94.639
WEXVUR	3.832	95.849
WOHXAT	3.832	98.331
UYOCET	3.832	130.334
CEPNAP	3.833	145.318
GUHWAJ	3.833	98.849
HUXGEP	3.833	100.028
NUHDIF	3.833	92.694
PERCUM	3.833	92.835
CEQKOB	3.834	95.84
COWQOX	3.834	104.632
DUBPOH	3.834	92.668
GOGYIL	3.834	134.441
HINWUZ01	3.834	114.228
INEGOX	3.834	144.234
LEGQEW	3.834	117.733
OLEMEZ	3.834	123.567
PUDKEH	3.834	94.641
REZQOF02	3.834	160.249
SATDEX	3.834	95.912
TUJSID	3.834	97.481
XODJIL	3.834	91.868
YOZLUW	3.834	119.17
ITEYIS	3.834	91.737
UYABII	3.834	101.018
UYABII	3.834	103.638
CIBZAR	3.835	156.389
JEGKIS	3.835	97.802
KAGQIV	3.835	139.811
LEBYUP	3.835	158.898
RUQFER	3.835	99.919
VELTOY	3.835	95.262
VIGLEF	3.835	90.819
UYUDEA	3.835	145.474
GUMMEI	3.836	93.68
LOTMOZ	3.836	158.956
MUNVID01	3.836	166.197
NEPREI	3.836	115.668
NEPREI	3.836	100.536
PETPOV	3.836	100.629
XUWWET	3.836	140.158
OXEDAZ	3.836	125.165
RUWQAE	3.837	100.993
ZUYDOP	3.837	177.165
CEDGEA	3.837	96.237
ENIGIR	3.837	97.456
GUHWAJ	3.837	95.73
DOJWAD	3.838	123.514
FAGSOY	3.838	92.857
MIVQAM	3.838	151.924
UXEXEC	3.838	153.672
WIHKEG	3.838	95.504
ZUDBIL	3.838	128.756
GABNUV	3.839	98.782
HUVMES	3.839	102.586
ISUVUO	3.839	163.117
NEHCIP	3.839	94.423
OLEMEZ	3.839	105.875
SILBAS	3.839	99.897
CARJAI	3.84	95.714
CARJAI01	3.84	95.506
DIWGIA	3.84	101.175
NIDHOA	3.84	142.283
SIJSUA	3.84	135.846
ATAKIS	3.84	90.989
AHOREV	3.841	101.174
ANUPUV	3.841	151.007
ASUMUX	3.841	155.851
CARGEJ	3.841	92.62
CIBZAR	3.841	127.194
DIKTEX	3.841	135.625
DINGUF	3.841	94.978
DUMPEH	3.841	112.902
HINWOT	3.841	138.456
NEZVAR	3.841	91.3
NIDDIQ	3.841	145.661
VUFRAS	3.841	159.511
XIQLUF	3.841	93.323
YIRFAJ	3.841	154.423
OZEFOR	3.841	98.399
NACDII	3.842	92.726
QARDUK	3.842	117.107
RUSCUG	3.842	152.221
SINSEP	3.842	93.64
TIKTOY	3.842	151.82
DIFTUI	3.843	164.145
IGEJIP	3.843	161.261
KOXXAZ	3.843	94.206
OPOYAU	3.843	174.916
QEYBIH	3.843	95.4
QODQEI	3.843	91.335
NORQET	3.844	137.623
ORANEC	3.844	126.595
PERLIK	3.844	96.857
SAJDAL	3.844	161.626
ARIROL	3.844	167.93
JUCBAM01	3.844	153.117
CIBZAR	3.845	108.437
DUNVUG	3.845	154.283
EPONUU	3.845	111.296
GETPUS	3.845	146.323
GUZYOQ	3.845	98.966
XOHHAE	3.845	162.279
AQUSOX	3.845	117.151
ATUMIL	3.846	131.715
EADMAX	3.846	112.801
EWOXIZ	3.846	108.494
IMITAB	3.846	103.797
KAPFOZ	3.846	167.406
QODRUW	3.846	152.076
RUQFER	3.846	104.336
XUDXID01	3.846	159.787
ARIROL	3.846	164.397
IQOQAJ	3.846	102.548
ASUMUX	3.847	94.314
NUKCAA	3.847	167.082
RIFLEA	3.847	129.638
XUVLIM	3.847	110.188
CROTEP	3.848	95.111
DOGNUK	3.848	151.495
REZQOF03	3.848	162.85
TUFBUS	3.848	113.611
WEXWAY	3.848	101.319
ITEYIS	3.848	91.258
DATCEI	3.849	101.731
DBIBZN	3.849	104.426
EZATOQ	3.849	97.505
LEGPUL	3.849	116.25
MERCAO	3.849	152.499
MULZOJ	3.849	152.516
LADVIZ	3.85	101.958
BIHKAG	3.85	103.449
COCQER	3.85	104.56
GOGYIL	3.85	139.484
HUXGOZ	3.85	94.527
KUPLOY	3.85	124.921
OJACUY	3.85	158.846
REZQOF01	3.85	136.305
TIPHAM01	3.85	150.455
VIDTIN	3.85	141.413
DATCEI01	3.851	98.042
FEXXIQ	3.851	100.826
JIBHIO	3.851	137.527
KOLGUO	3.851	123.197
QAVPIP	3.851	144.052
QEYVOI	3.851	162.956
QOLWIX	3.851	133.187
QQQETG01	3.851	158.947
TEPKUW	3.851	91.345
TIHJUR	3.851	142.299
WAJXIQ	3.851	98.937
ZIYJUO	3.851	94.711
NOQKEK	3.852	153.744
QUSTEE	3.852	163.806
VEMTAI	3.852	117.252
VEMTAI	3.852	144.035
ZEBKAU01	3.852	114.21
OZECAA	3.852	113.272
OZEFAD	3.852	158.676
CIYQUY01	3.853	148.171
ICSALA	3.853	90.861
NILYOZ	3.853	92.256
OKUFEG	3.853	152.551
PEVXAR	3.853	121.881
REZREW	3.853	136.5
RORWIG	3.853	101.142
SIKWOY	3.853	94.088
UREDIH	3.853	122.561
AJOGUE	3.854	109.757
NEGZEH	3.854	95.791
WEZCEM	3.854	93.587
XIPWOI	3.854	147.547
YIRFAJ	3.854	147.669
AFUHAN	3.855	90.779
ITUBEG	3.855	143.912
PUDKEH	3.855	90.448
QEVWIA	3.855	152.399
REZQOF02	3.855	157.215
RUQNUN	3.855	158.331
RUSFER	3.855	149.925
SUWJIG	3.855	120.366
UMEGAW	3.855	133.114
UPERAL	3.855	140.195
LABGII	3.856	95.73
UKUSAX	3.856	137.793
DAWRAX	3.856	97.935
GUHWAJ	3.856	178.567
HUCKIC	3.856	159.057
ISIJEZ	3.856	95.031
OCOQIG	3.856	91.978
REZQOF02	3.856	156.788
WEXVUR	3.856	91.031
WIGRUC	3.856	165.317
BAGJAW	3.857	113.06
IHXNAQ02	3.857	103.401
MEDYEC	3.857	127.968
NILYOZ	3.857	168.544
NUMTUM	3.857	103.712
OYOMAS	3.857	100.134
PUFHOP	3.857	99.017
TENRAI	3.857	171.199
TEVFIK	3.857	103.584
TIKTOY	3.857	145.487
TUJSID	3.857	146.499
XICZOB	3.857	132.084
FARCIN	3.858	92.492
FARCIN01	3.858	92.492
FIQGAQ	3.858	166.084
SIXPEW	3.858	95.828
SUTLID	3.858	137.328
TIBENQ	3.858	92.998
TOJXAT	3.858	90.69
YIRBUZ	3.858	120.372
CITSOP03	3.859	94.604
EDIKIO	3.859	119.134
GUHWAJ	3.859	125.328
HEYHEB	3.859	95.392
OLOQAK	3.859	164.691
AZAPID	3.859	92.301
UXASIY	3.859	93.598
UKUPIC	3.86	130.337
COPYEO	3.86	148.9
EBENUX	3.86	108.089
EDAROT	3.86	144.248
GUMMEI	3.86	112.33
IGALOS	3.86	158.124
LAYWAM	3.86	96.77
LUBFUM	3.86	101.364
REZREW	3.86	141.064
TAWHAD	3.86	151.659
TENRAI	3.86	145.625
UXIBOU	3.86	160.61
KOLHEZ	3.861	132.948
MEZHII	3.861	99.569
MOBDAL	3.861	113.284
MUNVID	3.861	166.947
OBEFIL	3.861	93.477
VAWDUU	3.861	118.107
WIGRUC	3.861	159.291
IMOQOT	3.861	99.612
RUWQAE	3.862	105.895
ASUNOS	3.862	157.614
COWQOX02	3.862	105.467
FUMZES	3.862	121.656
POWJIX	3.862	108.499
QACBAZ	3.862	100.506
SOWSOO	3.862	135.904
VAXZIF01	3.862	93.87
XAYDAF	3.862	95.075
XUDXEZ	3.862	104.392
ZIBXAL	3.862	127.075
FUMZES	3.863	136.787
HEYHEB	3.863	96.804
HUFJOK	3.863	109.113
HUHKIH	3.863	105.606
PUFLAF	3.863	95.489
UHAQUQ	3.863	127.619
OVUCAM	3.863	108.293
CEDHAX	3.864	129.725
DAVXAB	3.864	132.837
QAMSOM	3.864	152.169
TENPUA	3.864	107.014
YOZLOQ	3.864	105.811
HISZIU	3.865	91.242
MUCZUI	3.865	165.28
PUFHOP01	3.865	99.139
WEZCEM	3.865	126.868
YENFEE	3.865	130.782
ZELCOL	3.865	99.866
ITIYOC	3.865	100.013
OYOVEG01	3.865	146.786
CIJHEJ	3.866	123.085
FUMLIK	3.866	148.537
GEDGAA	3.866	130.516
HINWUZ	3.866	102.008
LOFWIM	3.866	151.797
REMPIL	3.866	107.937
TIJYOB	3.866	110.028
TOJBEA	3.866	104.421
DORFIB	3.867	169.994
GUMLUX	3.867	112.312
IMITAB	3.867	112.664
OVIKAG	3.867	130.169
RELXEO	3.867	92.075
REMNUV	3.867	134.001
REZQOF	3.867	157.722
REZQOF03	3.867	160.013
WAMBOE	3.867	108.858
YIRFUD	3.867	150.932
CIYQIL	3.868	91.756
DIKTAT	3.868	116.602
POKXET	3.868	91.373
RUWQAE01	3.869	92.365
ANUPOP	3.869	157.46
COWQOX03	3.869	105.803
JOHGEU02	3.869	97.691
LUBFUM	3.869	100.646
SATDEX	3.869	120.671
TONWUQ	3.869	149.118
YEJTOZ	3.869	105.271
AXOHIH	3.869	95.415
AFUHER	3.87	90.048
BUKVEL	3.87	101.982
BUNPAD	3.87	157.241
DATCEI01	3.87	93.362
FAWVEG	3.87	127.308
JIMNAX	3.87	96.627
JISJEB	3.87	117.235
KECWUM	3.87	93.373
SAJDAL	3.87	158.789
TUQNIF	3.87	150.301
VOMHAH	3.87	167.432
UKUJIW	3.871	93.401
MOTWIE	3.871	154.212
PUKDOR	3.871	132.684
REZKAL	3.871	134.984
SIKWOY	3.871	93.589
UGOLEK	3.871	142.472
AWUWEX	3.871	92.761
COWSIT	3.872	105.729
IGADUQ	3.872	91.485
KACREO	3.872	122.23
MEZGON	3.872	105.845
MUVYEK	3.872	120.832
NEGZEH	3.872	97.745
YASQIU01	3.872	121.504
IQIZIU	3.872	146.797
IWUTEC	3.872	95.384
EKIQOH	3.873	113.641
BIZYIT	3.873	91.984
CITPAX	3.873	172.524
DUNJEC	3.873	114.317
OJIHIA	3.873	93.663
QEYVOI	3.873	157.596
TIKCEX	3.873	124.384
YIJQAJ	3.873	95.352
FALJAH	3.874	99.682
KICHUC	3.874	98.692
LEZYAT	3.874	119.992
YONFAJ	3.874	136.895
ZIYJUO	3.874	104.601
AXOHUT	3.874	170.154
OYOVUW	3.874	103.12
FIMDEN	3.875	153.658
GAJRER	3.875	153.926
IYAFIZ02	3.875	163.566
KUWRAX	3.875	138.457
OMOLAD	3.875	92.822
VAZLOA	3.875	163.002
WIGSAJ	3.875	167.035
WUDHEJ	3.875	97.594
XUXLEK	3.875	122.757
YOYLAA	3.875	140.744
YUKNEX	3.875	110.46
CIBZAR	3.876	157.703
DAWSIG01	3.876	96.687
HEXGAV	3.876	169.085
HINWUZ01	3.876	120.736
JUZRIH	3.876	103.406
LONMIM	3.876	121.882
OCAKIP	3.876	158.101
OLELOI	3.876	136.162
PIPRUB	3.876	166.341
RUWSEI	3.876	129.87
ZABLOG	3.876	96.952
ZILNIT	3.876	134.943
UWUYOD	3.876	94.708
MADVUM	3.877	164.722
LAPHOB	3.877	166.908
NIFHAM	3.877	160.466
SABCIJ	3.877	101.315
SUWJIG	3.877	93.949
UYOVIO	3.877	142.615
VOMYOO	3.877	157.72
XUYBEZ	3.877	149.407
UKULEU	3.878	92.997
DAGHID	3.878	125.903
DOJPEA	3.878	95.539
DUWDIL	3.878	99.308
GUFNUS	3.878	99.234
HACMEG	3.878	139.467
IZOFAF	3.878	174.934
JIXBEX01	3.878	100.073
OJIGUL	3.878	102.079
POWJUJ	3.878	110.899
PUCZOF	3.878	172.816
VELTOY	3.878	94.248
FUXVUR	3.879	92.641
GULROW	3.879	138.77
ICAQIN	3.879	135.301
ISUVOI	3.879	164.463
LUZXAH	3.879	90.329
NEHCIP	3.879	97.676
OBEFIL	3.879	92.054
OMOLEH	3.879	157.075
PINMAC	3.879	101.162
QADQIW	3.879	152.479
RINPOW	3.879	102.866
TIMSOA	3.879	97.684
WAWFUW	3.879	91.772
WIZMEA	3.879	125.939
XEFZOZ	3.879	98.963
XESTIZ	3.879	90.584
YASQIU02	3.879	121.662
YUXKIM	3.879	129.042
APIYAC	3.879	121.94
OZEFAD	3.879	166.349
BEBGIY	3.88	148.713
EFUFAO	3.88	94.709
HUXGIT	3.88	97.611
ZOGVUO	3.88	101.093
ITEYAK	3.88	99.59
OSEMAD	3.88	108.874
BUVLIQ01	3.881	107.167
CARPEQ	3.881	97.823
DIWGIA	3.881	105.432
NAWDUL	3.881	164.268
SAJDEP	3.881	165.36
SIQWIZ	3.881	154.893
TAPMUT	3.881	130.613
UCOJAA	3.881	128.718
WIKGUT	3.881	105.785
UYUDEA	3.881	94.822
KUSRIC	3.882	93.781
FERHIW	3.882	126.114
JIBHAG	3.882	159.755
JOZCUZ	3.882	114.446
KUCLIG	3.882	126.613
OTAPAB	3.882	128.41
QOVQIE	3.882	98.131
SOQFAH	3.882	106.005
WIGSOX	3.882	155.677
DOWYUM	3.883	162.809
EYOFIH	3.883	104.749
GARVUT	3.883	114.808
GILKAO	3.883	95.326
JEVLEE	3.883	104.835
JUZRON	3.883	132.617
LAKTEY	3.883	104.98
QOGBOF	3.883	109.174
UXIHUG	3.883	131.763
VAZMIV	3.883	125.367
WIMDOO	3.883	108.762
YEJLII02	3.883	132.418
UKUJIW	3.884	166.471
BOPOMI	3.884	149.232
CEDGEA	3.884	126.128
IJOXEM	3.884	116.3
JIBHOU	3.884	137.403
MOCFUI	3.884	171.4
MURQIB	3.884	137.898
OLELOI	3.884	112.882
SATMEI	3.884	96.377
TONGEL	3.884	103.527
VEMSEM	3.884	94.372
BIHJIN	3.885	130.612
BIHJIN	3.885	90.954
DATCEI	3.885	98.555
KUWQOK	3.885	105.02
QUSTEE	3.885	97.214
TONVID	3.885	100.613
UPIZAX	3.885	102.005
UPIZAX01	3.885	102.577
AZEXOT	3.886	135.575
DAFJEB	3.886	147.084
DITYRS	3.886	141.371
EGOVOM	3.886	101.89
EPIWIL	3.886	103.954
HEYHEB	3.886	95.405
HIXVUI	3.886	93.316
HIZBAW	3.886	97.96
KUZFAN	3.886	98.805
NICTAW	3.886	139.424
OPEXUD	3.886	130.318
PESZOE	3.886	120.544
REZREW	3.886	138.739
SAYNOY	3.886	94.787
SINSEP	3.886	129.963
SOBXOZ	3.886	102.277
TITACE10	3.886	124.197
WUJWIH	3.886	99.264
XEPKIP	3.886	90.124
YASQIU03	3.886	121.517
YASTIX	3.886	172.642
ZIMYOL	3.886	125.911
FIMPEZ	3.887	147.456
GOVQUG	3.887	92.493
IBNZAM	3.887	93.915
IMITAB	3.887	133.11
KAHNIT	3.887	94.129
UNUQAW	3.887	146.133
ZOGTUM	3.887	132.451
HINWUZ	3.888	103.221
REZQOF02	3.888	159.479
TOBCEU	3.888	116.893
TOJXEX	3.888	92.468
WOHXAT	3.888	113.869
ZULNIF	3.888	166.698
EWUWOK	3.889	98.064
HOYWIE	3.889	149.61
HUHXOA	3.889	120.858
ILUDEA	3.889	146.519
PUFJIL	3.889	109.776
PUWXEM	3.889	124.791
TUJSID	3.889	144.024
XACFAK	3.889	129.178
XEFZOZ	3.889	90.338
YIRFAJ	3.889	153.975
UWUQAH	3.889	92.892
RUWPUX	3.89	106.069
BOZDEA	3.89	135.962
BULZOA	3.89	127.054
CBIOXO01	3.89	152.633
MOBVUX	3.89	161.825
OQEVIQ	3.89	146.044
SIVTIB	3.89	143.466
VOMHAH	3.89	108.825
WARLOS	3.89	103.733
BEPFOU	3.891	152.671
JIXBEX01	3.891	104.071
KUWYIM	3.891	106.261
LIRSIR	3.891	121.943
PUJMUD	3.891	117.9
SICFES	3.891	138.371
TAPMUT	3.891	101.26
WUFLUE	3.891	146.266
OREVUF	3.891	139.304
COJGUF	3.892	119.634
FEDBEY	3.892	114.573
GABPAD	3.892	166.719
OJIHEW	3.892	164.79
OXIBZN02	3.892	95.724
QUJSOF	3.892	114.31
ZOPTED	3.892	163.651
ATAGAG	3.892	90.266
DASZAB	3.893	135.905
DOGNUK	3.893	150.237
HINWUZ01	3.893	102.89
HOWXAU	3.893	97.017
KUCLIG	3.893	116.832
MIZYAX	3.893	140.222
WELDAV	3.893	117.022
WIHKEG	3.893	90.409
WONYIH	3.893	114.307
YASQIU04	3.893	121.514
RUWPUX	3.894	116.165
BUWQUG	3.894	149.987
FUXGEN	3.894	177.751
HINWEJ	3.894	97.791
IQITIL	3.894	159.666
MIWWIB	3.894	162.65
MOBVUX	3.894	92.091
MOVCIM	3.894	118.848
NUGSAK	3.894	153.797
PAFJAL	3.894	139.257
PAZCOI	3.894	140.646
QOMYOG	3.894	141.529
TAPRIN	3.894	159.895
UCUHEI	3.894	109.019
RUWQAE	3.895	97.314
APAMOV	3.895	101.162
BIZYIT	3.895	91.938
DIMZUX	3.895	92.964
FUJVIS	3.895	163.198
HUHXOA	3.895	92.966
JEVQOR	3.895	92.88
LAWVAJ	3.895	94.876
MIYKOU	3.895	105.367
RURRUS	3.895	109.396
SAYKUZ	3.895	137.233
UXOVAH	3.895	139.671
DISZOX	3.896	97.464
IADRCH	3.896	138.743
IPMALT	3.896	149.634
JIBHAG	3.896	95.63
MIVPUF	3.896	146.512
QEVWIA	3.896	94.236
TEYGEL	3.896	131.579
YUHLOD	3.896	177.849
YUHLOD	3.896	100.232
YUHLOD	3.896	94.837
LADVIZ	3.897	102.93
MADVUM	3.897	133.364
DAWSIG	3.897	96.729
DITHPA10	3.897	164.948
DIWGIA	3.897	107.133
KIKMUN	3.897	131.702
NUDVIU	3.897	162.953
QEYCAA	3.897	155.411
QUXKOL	3.897	90.597
RAHGEP	3.897	144.564
SECXEF	3.897	119.783
SOKQUH	3.897	163.989
UZEGUD	3.897	90.769
YANPIP	3.897	103.936
YUQNOO	3.897	106.251
ZABLUM	3.897	102.996
EJOMOI	3.898	125.398
BAGJAW	3.898	107.591
DUBNUL	3.898	106.915
EWUWUQ	3.898	98.204
GALBON	3.898	123.394
LEJBUA	3.898	116.905
REZREW	3.898	141.085
YAYCUY	3.898	169.671
ZEBLAV	3.898	151.831
UWUHIG	3.898	112.307
AVOPOS	3.899	152.921
CEFYUJ	3.899	113.363
COPYEO	3.899	114.251
ISEDOA	3.899	148.27
JEVLEE	3.899	104.85
JUQCUV	3.899	160.884
KOGQUU	3.899	140.417
KUFRAH	3.899	130.786
KUMSET	3.899	104.442
KUXCAJ	3.899	98.634
POLQOZ	3.899	161.56
QUYRIO	3.899	91.27
SUTLOJ	3.899	130.921
VUFREW	3.899	135.06
WARLOS	3.899	141.405
WEZCOW	3.899	120.127
ZIMXUQ	3.899	114.272
UWOSUX	3.899	113.488
ANUPOP	3.9	165.49
FIYXET	3.9	161.153
IVEXIS	3.9	95.66
JEVMON	3.9	91.971
PIHMAW	3.9	141.013
TEPKIK	3.9	91.507
WOJQAN	3.9	155.998
CIBZAR	3.901	145.708
GUBGAO	3.901	149.827
JIBHIO	3.901	164.855
LORRER	3.901	95.319
MAMDOW	3.901	146.242
QIPYIA	3.901	101.946
RUQFER	3.901	118.104
TOKFEG	3.901	91.764
WACBOU	3.901	96.661
ATAGOU	3.901	121.54
FALJAH	3.902	97.779
IHUMON	3.902	141.806
JUZRON01	3.902	111.149
KAHNIT	3.902	92.593
KAZCIA	3.902	98.533
MIMCIW	3.902	98.437
UKAGAP	3.902	136.08
FALKIQ	3.903	108.998
EQUXAR	3.903	114.109
JIBHAG	3.903	164.633
JUZRIH	3.903	131.304
KAFBID01	3.903	111.829
ROBNON	3.903	99.834
SEDBIP	3.903	106.996
YUVXUK	3.903	150.766
GAGVET	3.904	97.228
OJIBUH	3.904	154.573
DINYOR	3.904	112.288
ICAXOC	3.904	152.088
MUDQOS	3.904	124.431
MUXDAN	3.904	127.672
NOVDEJ	3.904	125.449
OJILEA	3.904	97.974
TOSOXY	3.904	90.984
YIRFAJ	3.904	145.823
CABGAR	3.905	123.008
DURHEG	3.905	143.423
IQAQUO	3.905	102.872
LEVHOL	3.905	102.64
LISSIS	3.905	99.08
MOWQUM	3.905	140.658
WIGTIS	3.905	165.349
YIRFAJ	3.905	148.773
YOYWOA	3.905	95.079
CUDMAS	3.906	95.599
DINGOZ	3.906	116.05
FOKWOU	3.906	95.833
GUHVUC	3.906	178.594
KIDKOZ	3.906	144.461
KOLGUO	3.906	112.939
RACVIB	3.906	101.957
WUPPEF	3.906	135.576
XUYBAV	3.906	103.01
YATJUA	3.906	102.919
ZEBKAU	3.906	98.7
HUXHEQ	3.907	124.059
IDIHUB01	3.907	156.34
ITYAEA10	3.907	131.513
KATPAY	3.907	141.133
KECXIB	3.907	90.43
NEGZEH	3.907	92.195
NISHII	3.907	127.095
OIBZAC	3.907	126.993
RALTEG	3.907	155.216
RENROU	3.907	143.465
WIDYUG	3.907	91.54
WIZMEA	3.907	126.31
WOHXAT	3.907	140.182
ZUQMIJ	3.907	149.959
ITEYIS	3.907	140.325
OZAZOH	3.907	102.802
GARVON	3.908	93.903
NERLOO	3.908	100.009
RUQFER	3.908	106.183
TULYUW	3.908	123.877
VALRAD	3.908	123.65
VUCWIA	3.908	109.685
BEHRUD	3.909	100.75
IDUJOH	3.909	93.284
SORYIJ	3.909	95.652
WOJQER	3.909	140.392
YOBKOS	3.909	91.064
ZIJHEH	3.909	99.685
ATAGOU	3.909	128.237
ATAGOU	3.909	92.282
UYIGIV	3.909	105.064
ATEHAJ	3.91	135.154
BISBIQ	3.91	90.67
CEQKER	3.91	92.272
CUSPOY	3.91	129.791
CUSPOY	3.91	130.263
EHIQET	3.91	100.808
ENIGUD	3.91	130.688
INPHAC	3.91	144.101
IVUHEN	3.91	152.323
MOCGAP	3.91	118.478
SUTLID	3.91	94.324
UFAWIJ	3.91	100.409
YANPEL	3.91	143.726
CIBZAR	3.911	146.482
JOMDOG	3.911	137.3
JUMQOA	3.911	129.848
KUQWUR	3.911	100.672
KUWYUY	3.911	108.788
LAWBAO	3.911	123.037
MAGHIO	3.911	113.076
POGZOD	3.911	140.912
QOCJEA	3.911	144.171
WOJQER	3.911	126.398
YASQIU05	3.911	121.64
ITEYOY	3.911	139.845
MABGUV	3.912	147.102
FORPAF	3.912	151.618
HUXGEP	3.912	132.427
JUWMUL	3.912	97.901
LEYPOX	3.912	129.808
OLEMEZ	3.912	142.058
PEKWOT	3.912	96.432
WEFQAB	3.912	102.054
WIFVAJ	3.912	155.263
YOYLAA	3.912	120.673
JALKOX	3.913	107.863
MIZYAX	3.913	95.348
POWGIU	3.913	111.846
SILBEW	3.913	135.248
TAQSAI	3.913	101.186
VEYXUV	3.913	94.246
VUCHEG	3.913	144.369
XEPXUN	3.913	96.049
ZZZAVM02	3.913	103.645
REKYAI01	3.913	136.866
QQQETG03	3.914	153.585
COFFIO	3.914	105.79
DAVXAB	3.914	90.894
EMACEC	3.914	127.748
FUSPUG	3.914	168.212
GAFTIR	3.914	118.842
GILFEN	3.914	148.569
HUHXOA	3.914	120.756
HUQTET	3.914	119.476
VEJLEC	3.914	110.355
VESJAH	3.914	135.021
HOJWOV	3.915	98.387
LEBYOJ	3.915	141.721
OHOWOZ	3.915	151.096
UVONEZ	3.915	124.277
VENXIY	3.915	99.332
WOHLUC	3.915	95.204
WUZKAG	3.915	151.093
ZICRAG	3.915	160.597
BEBMEB	3.916	99.958
BENICL01	3.916	126.156
BUNLEE	3.916	115.532
DUNJEC	3.916	139.877
FIQHEU	3.916	144.169
GALBIH	3.916	125.036
GUQWAS	3.916	111.773
JIKMOF	3.916	132.227
NEGZEH	3.916	157.671
NUDVEQ	3.916	169.134
NUPROG	3.916	97.23
RUWSEI	3.916	131.553
SIKWOY	3.916	135.037
UROCIO	3.916	132.407
WUMDAM	3.916	103.041
XABWOP	3.916	119.846
DIMTUQ	3.917	91.225
MOBQUQ	3.917	92.493
MOCFOC	3.917	164.297
OPOXIB	3.917	97.017
RABWEA	3.917	160.426
TUQREE	3.917	100.719
UJISIR	3.917	173.504
YANPIP	3.917	161.634
TADPEX	3.917	97.259
XAHRAD	3.918	94.786
DAFJEB	3.918	127.387
KEMJAQ	3.918	160.831
MEZHEE	3.918	163.844
NUFTIU	3.918	156.854
QIZQIB	3.918	147.384
TAPSIO	3.918	124.926
UJISEN	3.918	177.509
VENREO	3.918	109.908
WUBCEE	3.918	95.747
TIHZAM01	3.919	92.184
KUDFEX	3.919	143.98
NINSUB	3.919	100.454
POPTUK	3.919	103.456
QEZCED	3.919	102.949
RIFZUE	3.919	107.363
RIGFAP	3.919	91.691
TIPJOU	3.919	132.446
XISDUB	3.919	99.298
YAFGAN	3.919	113.312
YAHJEX	3.919	93.859
YANPIP	3.919	158.69
ZUVJAD	3.919	97.181
IHXNAQ03	3.92	131.396
LUNDIH	3.92	104.642
NILYAJ	3.92	95.833
SUTLOJ	3.92	130.726
TIMFEC	3.92	92.915
TOKFEG	3.92	172.308
YOQJIA	3.92	141.045
ZIMKOY	3.92	148.653
OZEFAD	3.92	108.594
BUNLEE	3.921	128.507
CARHAG	3.921	107.911
CELPEP	3.921	91.598
DISZOX	3.921	134.698
GANZUR	3.921	112.398
GITDET	3.921	116.947
JIXBEX	3.921	100.407
PEVYAS	3.921	121.931
ROZYUD	3.921	143.834
CEQVUS	3.922	90.531
DENBOQ	3.922	139.302
FOMKAU	3.922	123.458
HUHXOA	3.922	91.384
KUSFAI	3.922	98.797
NEVYIX	3.922	140.68
UCASOJ	3.922	96.896
VEYBAD	3.922	90.439
XEYLEU	3.922	116.268
YAQXEW	3.922	103.285
ZOPTED01	3.922	90.594
IBBIOX01	3.923	125.391
KOKTAI	3.923	92.184
KUXBIQ	3.923	107.321
MEZGIH	3.923	109.247
MUTLIX	3.923	100.853
NEGZEH	3.923	103.678
QODSIL	3.923	138.923
REMPEH	3.923	166.291
ZOHVOJ	3.923	130.624
AWUWOH	3.923	121.241
IWUGUF	3.923	156.426
OSELOQ	3.923	151.403
UWOSOR	3.923	113.965
EGOVIG	3.924	109.209
KAZCOG	3.924	98.34
MUVZAH	3.924	107.456
MUXDER	3.924	103.192
REZQOF01	3.924	152.131
XITXII	3.924	127.023
YEJKOO	3.924	167.695
UYUZEW	3.924	146.366
DIKTAT02	3.925	115.946
EFUFES	3.925	94.431
JIXBEX01	3.925	106.154
JUQPIX	3.925	100.106
RUGSOD	3.925	126.391
UDIJEZ	3.925	102.119
UDIXIQ	3.925	140.272
EWEWOV01	3.925	96.452
ABIYUI	3.926	91.514
BUTKUY	3.926	97.993
DAVHIU	3.926	141.554
GUKBEV	3.926	132.685
HEZFOK	3.926	92.33
LEPPEC	3.926	98.281
NERLUU	3.926	100.414
OHETIG	3.926	146.298
PETBAT	3.926	133.225
PIPRUB	3.926	168.473
REZQOF01	3.926	91.119
SUWLED	3.926	97.128
TENPUA	3.926	157.457
WAMBOE	3.926	104.62
WORYUZ	3.926	101.001
YETMOC	3.926	95.386
ZUQMIJ	3.926	157.395
ONALAT	3.926	115.851
AGULEW	3.927	95.774
CEDHUR	3.927	110.947
CEQKIV	3.927	92.918
CHNPIH10	3.927	95.279
CHNPIH10	3.927	125.751
GESQEC	3.927	121.507
GUZYOQ	3.927	91.05
JEDWEX	3.927	168.284
LAQDEO	3.927	122.344
MAMDIQ	3.927	105.029
MIQKUU	3.927	147.973
NERLOO	3.927	96.684
NETYEQ	3.927	146.456
NOGYUF	3.927	91.587
TIPHAM01	3.927	132.734
XOSCAJ	3.927	127.519
XUKXIM	3.927	114.814
EYITAH	3.928	93.07
GOVQUG	3.928	174.537
HIBGUX	3.928	103.717
MAMFAK	3.928	163.608
NICSOJ	3.928	136.802
NOQJIN	3.928	91.917
OVODUA	3.928	109.287
POJWOD	3.928	92.829
QIWVAV	3.928	114.815
RERNAE	3.928	96.115
SABSAS	3.928	107.389
SUNFUE	3.928	103.087
SUWLED	3.928	95.655
TAPROT01	3.928	121.06
TONMIT	3.928	165.161
YOGYOK	3.928	156.006
ARIVUV	3.928	98.734
UNOVIF	3.928	110.486
ANUPUV	3.929	174.498
EZOZID	3.929	97.46
GEHXAU	3.929	143
IHENOA	3.929	160.345
MUNVID	3.929	168.624
OIBZAC01	3.929	127.313
OJACUY	3.929	146.702
SABSAS	3.929	107.44
WAWMEN	3.929	125.355
YIRFAJ	3.929	106.721
ZEBKAU01	3.929	94.637
OJIBUH	3.93	157.293
ABAPEB	3.93	102.604
CEGLAE	3.93	158.562
KIFWIH	3.93	94.57
OJIKOJ	3.93	98.877
QUDBIB	3.93	95.501
SUWJUS	3.93	134.204
TULYUW	3.93	128.609
VOXDUK	3.93	116.332
WALTAH	3.93	117.588
WIGSOX	3.93	131.086
ZAHGAQ03	3.93	118.035
BUPRUC	3.931	131.14
HOXZIE	3.931	102.35
HUHXOA	3.931	90.532
KUWYOS	3.931	121.665
LOWBEG	3.931	165.013
MAMFEO	3.931	100.961
MUDFOI	3.931	90.19
POKXAP	3.931	90.186
REZQOF	3.931	90.14
SAJPIF	3.931	140.803
TADPUM	3.931	137.916
WOJQER	3.931	150.875
UYUDEA	3.931	144.187
CADRAD	3.932	155.795
FAHSEO	3.932	99.985
GOVQUG	3.932	90.049
IQAQUO	3.932	104.224
JODTUT	3.932	130.665
NAFFIM	3.932	104.815
OTENUY	3.932	91.234
QQQETG01	3.932	154.746
REZQOF	3.932	152.993
REZQOF02	3.932	157.573
SEJSUY	3.932	93.951
SUHFEJ	3.932	164.882
SUKCOQ	3.932	95.852
WOMFAI	3.932	101.379
[truncated: 17,601 more rows]

## Sheet: 7 membered rings
NAME	DIST1	ANG1
XAMBAP	3.454	168.447
GICVAQ	3.603	143.487
LADWUM	3.652	145.754
COBYID	3.663	109.683
IYAFIZ02	3.723	160.754
GICVAQ	3.742	149.244
COBYID	3.778	105.275
SIVWUP	3.788	92.717
KAFSOD	3.824	104.256
WELCOI	3.833	136.996
LADWEW	3.841	143.904
LADWEW01	3.864	144.748
UTIMIV	3.868	106.744
COBYID	3.877	100.688
BEPPOB	3.89	103.936
UTIMIV	3.903	100.494
TEQKUY	3.907	124.221
MUMTUK	3.921	167.872
NETDAS	3.928	111.738
KAFSOD	3.929	118.899
KAFTAQ	3.929	122.227
NUWSAC	3.931	106.091
SIVWUP	3.939	133.32
DITCDC	3.943	156.558
SUKCOQ	3.948	96.75
VUXDOJ	3.949	120.15
TIHJUR	3.957	94.834
IDIXOK	3.959	98.487
NETDAS	3.961	125.885
NUWSIK	3.961	136.173
GUDJUL	3.963	91.354
MIDKOA	3.965	163.524
ACUTAV	3.968	102.695
ILOQAD	3.97	121.788
UTIMIV	3.97	102.468
UTIMIV	3.978	99.088
NETDAS	3.979	137.385
WAHLUM	3.981	133.924
XAMBAP	3.989	111.502
LADWEW	3.991	149.82
NUWSIK	3.993	156.164
KAFTAQ	3.998	106.315
LADWEW01	3.999	150.301
KAFSOD	4.003	106.778
IDIXOK	4.004	111.391
SIKWOY	4.005	114.098
WAHLUM	4.007	114.811
XAMBAP	4.011	92.377
IPCUND	4.017	112.248
IPCUND	4.017	112.248
GICVAQ	4.021	154.72
GUDJUL	4.023	98.666
UTIMIV	4.025	145.905
ZULZEL	4.026	94.28
NETDAS	4.031	141.598
NUWSIK	4.037	96.237
INODEU	4.043	92.075
VAKYEL	4.046	123.617
NETDAS	4.05	145.841
XIMSIX	4.051	99.796
COBYID	4.054	94.772
HUXRAV	4.054	117.901
MIWSAM	4.055	139.391
NUWSAC	4.055	121.017
TAVBEA	4.061	129.417
KAFSOD	4.062	119.833
NUWSIK	4.062	99.86
TAVBEA	4.063	117.674
KAFSOD	4.069	109.255
UTIMIV	4.071	136.982
KAFSOD	4.072	93.125
IYAFOF02	4.077	95.555
VUXGIG	4.078	147.247
IYAFOF02	4.083	149.742
NETDAS	4.087	122.862
COBYID	4.092	140.151
UTIMIV	4.092	115.695
BUHXEH	4.095	122.137
AVAKEN	4.098	126.262
TEZVUQ	4.098	99.446
VONBIJ	4.098	110.481
VUXGIG	4.1	103.412
WAHLUM	4.109	95.04
UTIMIV	4.11	143.188
REZDAC	4.112	105.98
CAWJOZ	4.114	114.479
KAFSOD	4.116	93.085
WAHLOG	4.121	117.424
GICVAQ	4.122	153.157
VIZLIC	4.122	123.725
MIWSAM	4.125	132.774
REZDAC	4.125	150.058
JUYNOJ	4.126	146.864
UTIMIV	4.127	144.675
SIVWUP	4.13	121.097
TEQKIM	4.131	109.716
NETDAS	4.133	109.339
UTIMIV	4.135	98.003
QIKKAW	4.137	104.229
GEBLEE	4.138	99.751
GICVAQ	4.14	138.209
GUDJUL	4.14	98.284
UTIMIV	4.14	142.608
ZULZEL	4.14	139.803
WAHLUM	4.142	107.102
COBYID	4.146	92.082
WEYZIM	4.146	158.944
NETDAS	4.148	108.368
TEZVUQ	4.148	97.34
KAFSOD	4.151	114.886
NETDAS	4.152	90.685
IPUDED	4.153	154.484
VONBEF	4.153	104.113
NETDAS	4.157	142.685
BOLEIA	4.164	95.122
UTIMIV	4.166	122.534
CAWJOZ	4.168	102.414
TAYFUW	4.17	148.503
VIZLUO	4.173	93.148
KAFSOD	4.175	135.89
CAWJOZ	4.175	119.713
KAFSOD	4.176	112.865
CEWCEP	4.177	90.222
VONBIJ	4.177	111.051
RUSFIV	4.178	106.746
KAFTAQ	4.18	154.132
TEZVUQ	4.18	129.058
VIZLOI	4.186	92.743
KAFSOD	4.189	111.547
ZULZEL	4.19	121.049
IPUDED	4.193	97.836
WAHLOG	4.194	99.619
UTIMIV	4.198	98.53
DITCDC	4.201	103.17
NETDAS	4.201	90.648
WEYZIM	4.201	133.418
YIJTOA	4.201	119.597
TEQKUY	4.202	98.684
WAHLUM	4.203	94.182
UTIMIV	4.204	99.192
COBYID	4.205	111.158
IPCDEC	4.208	98.245
UTIMIV	4.208	91.61
WEYZIM	4.209	104.925
UTIMIV	4.212	134.166
WAHLUM	4.212	105.072
IPCDEC	4.215	101.657
IPCUND	4.216	117.264
NETDAS	4.22	108.54
VIZLOI	4.22	90.271
GUDJUL	4.221	134.7
UTIMIV	4.227	117.491
YIJTOA	4.229	109.257
ZULZEL	4.229	147.114
ZULZEL	4.229	127.107
KAFSUJ	4.233	103.645
COBYID	4.235	93.373
DITCDC	4.236	93.898
GEBLEE	4.238	150.797
COBYID	4.242	120.916
BEPPOB	4.243	110.711
KAFSOD	4.245	96.525
HUXRAV	4.246	112.31
KAFTAQ	4.251	96.386
GICVAQ	4.255	153.488
HURYIE	4.256	105.49
REZDAC	4.256	106.369
UTIMIV	4.257	133.731
TIHJUR	4.258	95.295
TAVBIE	4.262	119.475
WEYZIM	4.265	124.772
WEYZIM	4.265	91.803
NETDAS	4.269	110.411
TANRAB	4.27	93.162
FOYMEL	4.272	167.108
KAFSOD	4.275	106.013
CAWJOZ	4.276	114.959
IPCUND	4.276	93.987
IPCDEC	4.283	90.563
VONBIJ	4.283	111.753
BUHXEH	4.292	109.938
IPCUND	4.292	104.896
NUWSIK	4.295	91.271
BERLIT	4.297	102.488
LADWEW	4.303	95.911
NETDAS	4.305	105.317
ZULZEL	4.305	123.277
UTIMIV	4.308	90.35
INODEU	4.313	144.503
VONBIJ	4.317	104.648
NUWSEG	4.32	151.277
UTIMIV	4.32	130.958
CAWJOZ	4.323	98.133
MURXUT	4.33	111.416
NETDAS	4.33	118.606
LADWEW	4.332	91.576
MUMTUK	4.332	102.063
NETDAS	4.333	107.993
ZOJSIC	4.335	92.351
VONBEF	4.336	128.809
BEPPOB	4.337	94.67
WAHLUM	4.337	123.656
HUXRAV	4.34	92.134
NETDAS	4.343	159.52
WAHLUM	4.343	105.324
NETDAS	4.344	96.911
WAHLUM	4.344	99.106
CAWJOZ	4.346	107.939
HUXRAV	4.346	136.325
YIJTOA	4.346	94.227
SOCJOJ	4.349	124.202
KAFSOD	4.352	128.966
GICVAQ	4.354	119.654
NETDAS	4.354	142.244
FUPFII	4.356	140.683
MIWSAM	4.363	102.274
VAKYEL	4.363	161.541
WEYZIM	4.364	151.658
TEZVUQ	4.367	152.546
EYENUS	4.372	128.368
GICVAQ	4.378	120.337
HURYIE	4.379	93.413
KAFSOD	4.38	119.104
SIKWOY	4.38	149.137
NETDAS	4.381	126.165
XAMBAP	4.382	107.308
JUYNOJ	4.386	129.148
WELCOI	4.386	126.507
COBYID	4.387	90.022
LADWEW01	4.39	92.023
ZULZOV	4.39	114.933
LADWEW01	4.394	96.077
NETDAS	4.396	157.419
IPCUND	4.4	101.757
VUXDOJ	4.401	105.711
VUXDOJ	4.405	94.888
NETDAS	4.409	95.588
WAHLUM	4.412	118.457
FIGQAP	4.414	147.933
TAVBUQ	4.414	108.247
VUXDOJ	4.416	169.064
GICVAQ	4.42	124.075
BEPPOB	4.425	101.567
WAHLUM	4.425	92.867
NUWSIK	4.427	104.542
GICVAQ	4.43	93.354
GICVAQ	4.433	117.91
IDIXOK	4.433	128.9
SIVWUP	4.433	151.015
KAFSUJ	4.438	99.692
IYAFIZ02	4.439	123.254
IPCDEC	4.44	125.726
NETDAS	4.443	158.423
UTIMIV	4.444	98.215
COBYID	4.455	97.491
XAMBAP	4.456	125.015
ZULZOV	4.457	121.324
NETDAS	4.458	112.849
GUDJUL	4.459	106.671
TEQKUY	4.46	135.422
UTIMIV	4.465	153.082
IPUDED	4.47	108.661
NUWSIK	4.47	91.441
WECQEC	4.473	111.503
TAVBUQ	4.475	106.842
VONBIJ	4.475	106.377
SIVWUP	4.476	131.278
NUWSAC	4.479	90.019
DITCDC	4.48	98.571
UGAZEH	4.482	106.346
DITCDC	4.484	99.931
UTIMIV	4.484	116.953
REZDAC	4.489	121.323
TAVBEA	4.495	116.179
WAHLUM	4.495	101.078
LADWEW	4.499	132.615
WECQEC	4.499	128.33
NETDAS	4.5	92.322
DITCDC	4.502	108.131
KAFSOD	4.503	105.43
COBYID	4.503	125.205
KAFTAQ	4.517	104.747
KAFTAQ	4.52	165.259
HURYIE	4.521	166.1
GICVAQ	4.522	133.947
WAHLUM	4.526	103.738
WELCUO	4.528	125.51
NETDAS	4.53	104.025
COBYID	4.531	106.733
NETDAS	4.532	92.408
KAFTAQ	4.535	130.402
TANRAB	4.535	101.994
SIKWOY	4.539	99.471
LADWEW01	4.54	132.634
DITCDC	4.541	101.988
MIWSAM	4.541	164.334
TAVBUQ	4.543	97.683
WAHLUM	4.549	102.825
WEYZIM	4.551	141.164
VIZLUO	4.552	165.81
XAMBAP	4.554	113.864
MURXUT	4.555	156.497
CAWJOZ	4.557	131.78
FUPFII	4.557	90.752
WAHLUM	4.557	115.252
WEYZIM	4.559	122.848
WELCOI	4.56	128.334
DITCDC	4.564	122.191
PLENOL10	4.57	150.165
NETDAS	4.574	119.472
VONBIJ	4.574	103.935
XMTDIB	4.577	121.5
NUWSEG	4.58	90.4
HUXRAV	4.582	114.22
VIZLOI	4.583	137.579
ZULZEL	4.588	150.781
DAWMUK	4.59	91.274
DITCDC	4.59	138.04
MURXUT	4.59	97.902
TAVBEA	4.59	116.513
IYAFOF02	4.592	140.786
GICVAQ	4.593	118.028
KAFSOD	4.594	99.522
YIJTOA	4.595	112.969
VIZLIC	4.601	138.794
TAVBIE	4.603	104.638
WECQEC	4.604	125.629
UTIMIV	4.605	106.74
UTIMIV	4.605	121.175
UTIMIV	4.607	117.428
VIZLUO	4.607	97.771
CAWJOZ	4.609	110.657
NUWSIK	4.611	131.641
KAFSOD	4.613	94.762
BERLIT	4.618	97.536
HUXRAV	4.621	112.241
UTIMIV	4.623	121.959
MIWSAM	4.625	101.831
NUWSEG	4.625	90.969
CAWJOZ	4.626	94.267
HUXRAV	4.626	132.919
NUWSEG	4.626	117.385
UTIMIV	4.627	120.511
WECQEC	4.631	133.732
SIKWOY	4.639	129.527
KAFSOD	4.64	92.684
LADWUM	4.64	99.198
VONBEF	4.643	151.571
QIKKAW	4.645	142.976
BUHXEH	4.654	94.573
LADWUM	4.659	144.178
TAVBEA	4.66	104.736
IPCUND	4.663	102.903
IPCUND	4.663	102.903
AVAKEN	4.664	112.133
MIWSAM	4.664	135.429
RUSFIV	4.665	110.735
ZOJSIC	4.665	104.386
ZOJSIC	4.665	104.386
VONBIJ	4.672	90.257
